# Supplementary material for: Rubella virus tropism and single-cell responses in human primary tissue and microglia-containing organoids
Source: eLife. 2023 Jul 20;12:RP87696. doi: 10.7554/eLife.87696 (PMC10370260; doi:10.7554/eLife.87696)
Supplement: Figure 5—source data 2. [file elife-87696-fig5-data2.xlsx]

## Sheet: Orgs. with MG + - RV
Dividing Cells							Radial Glia							IPC							Excitatory Neurons
Gene	p_val	avg_log2FC	pct.1	pct.2	p_val_adj		Gene	p_val	avg_log2FC	pct.1	pct.2	p_val_adj		Gene	p_val	avg_log2FC	pct.1	pct.2	p_val_adj		Gene	p_val	avg_log2FC	pct.1	pct.2	p_val_adj
IGFBP2	3.14632e-115	0.833352	0.839	0.565	6.94015e-111		IGFBP2	1.72756e-89	0.770207	0.805	0.563	3.81066e-85		HNRNPA1	3.08628e-40	0.437922	1	1	6.80772e-36		TUBB2A	5.2153e-87	-0.662958	0.915	0.966	1.15039e-82		Organoids with transplated microglia
ENO1	2.32769e-72	0.511759	0.998	0.998	5.13442e-68		NME2	2.08321e-72	0.533233	0.578	0.253	4.59515e-68		IGFBP2	4.26879e-37	1.02621	0.664	0.39	9.4161e-33		RNASEK	2.60331e-71	0.520229	0.344	0.085	5.74239e-67		Exposed to RV (positive log2FC) or not exposed to RV
TOMM5	1.86548e-60	0.493341	0.716	0.469	4.11488e-56		ACTB	8.82041e-67	0.459209	1	1	1.94561e-62		RNASEK	1.69493e-35	0.512135	0.391	0.105	3.73868e-31		DYNC1I2	1.1742e-49	-0.486069	0.75	0.852	2.59004e-45		p_val	p-value
NDUFA13	3.81465e-58	0.432534	0.946	0.861	8.41436e-54		TMSB10	1.22046e-57	0.469547	1	1	2.6921e-53		NDUFA13	7.70059e-34	0.524566	0.915	0.791	1.6986e-29		SOX4	8.36956e-47	-0.468435	0.999	0.999	1.84616e-42		avg_log2FC	average log fold change
SEC61G	4.91776e-58	0.42082	0.961	0.898	1.08476e-53		NDUFA13	1.93798e-48	0.396683	0.94	0.854	4.2748e-44		H3F3B	5.51077e-27	-0.354482	1	1	1.21557e-22		TUBB2B	1.26895e-46	-0.397213	0.999	0.999	2.79906e-42		pct1	percentage of cells in the cluster where the gene is expressed
LDHA	1.58726e-52	0.770835	0.735	0.544	3.50118e-48		ENO1	2.85164e-48	0.394664	0.994	0.995	6.29015e-44		SOX4	1.73165e-23	-0.458534	0.996	0.999	3.81967e-19		TMSB10	5.44433e-46	0.282099	1	1	1.20091e-41		pct2	percentage of cells on average in all other clusters
TMSB10	9.98093e-51	0.335298	1	1	2.20159e-46		H3F3B	1.97539e-46	-0.328932	1	0.999	4.35732e-42		PKM	3.71051e-20	0.42175	0.984	0.944	8.18465e-16		SEZ6L2	5.43009e-45	-0.487429	0.378	0.602	1.19777e-40		p_val_adj	adjusted p value
RPP21	2.92124e-50	0.420186	0.53	0.288	6.44368e-46		HNRNPA1	5.18165e-43	0.394959	0.999	0.992	1.14297e-38		AC023034.1	4.45435e-20	-0.392485	0.123	0.324	9.82541e-16		CHCHD2	5.17318e-43	0.627523	0.668	0.471	1.1411e-38
HNRNPA1	5.3739e-49	0.279278	1	1	1.18537e-44		ENY2	7.43717e-43	0.464515	0.849	0.726	1.64049e-38		SEC61G	5.20849e-20	0.386332	0.974	0.941	1.14889e-15		RPP21	2.98223e-42	0.407964	0.36	0.154	6.5782e-38
NME2	9.97247e-47	0.351232	0.575	0.289	2.19973e-42		RNASEK	1.76997e-40	0.308626	0.396	0.178	3.9042e-36		FAU	2.98982e-19	-0.259832	1	1	6.59494e-15		HNRNPA1	1.54769e-40	0.313483	1	1	3.4139e-36
PAM16	9.76356e-45	0.311479	0.382	0.158	2.15365e-40		SEC61G	3.22998e-39	0.357985	0.964	0.914	7.12468e-35		NME2	1.18576e-18	0.325878	0.275	0.093	2.61554e-14		NDUFA13	2.08326e-37	0.364478	0.93	0.848	4.59526e-33
KRTCAP2	5.08559e-43	0.34739	0.794	0.589	1.12178e-38		NPM1	1.48175e-37	0.388814	0.997	0.986	3.26844e-33		CHCHD2	1.80252e-18	0.608533	0.65	0.462	3.97601e-14		FAU	2.73675e-37	-0.261049	1	1	6.03673e-33
FILIP1	5.30159e-42	-0.456272	0.408	0.622	1.16943e-37		RPP21	1.36484e-34	0.311858	0.45	0.243	3.01057e-30		DYNC1I2	4.38368e-18	-0.41818	0.713	0.85	9.66951e-14		PAM16	1.44904e-36	0.297219	0.218	0.062	3.19628e-32
NPM1	4.53228e-38	0.274433	0.999	0.993	9.99731e-34		MALAT1	2.55941e-32	-0.296044	1	1	5.64554e-28		AP2B1	1.73588e-16	-0.395321	0.316	0.518	3.82901e-12		ACTB	5.14546e-36	0.31374	1	1	1.13499e-31
HDAC2	3.01285e-36	0.357602	0.938	0.87	6.64576e-32		HNRNPA2B1	1.79214e-31	0.340214	0.976	0.959	3.95311e-27		RPP21	3.35834e-16	0.320742	0.329	0.146	7.40783e-12		MYL6	3.21222e-34	0.293364	1	1	7.08552e-30
LITAF	1.09819e-33	-0.442336	0.347	0.531	2.42239e-29		TOMM5	7.65237e-31	0.371474	0.549	0.371	1.68796e-26		NOVA1	1.29849e-15	-0.441894	0.363	0.557	2.86421e-11		AC023034.1	1.88171e-33	-0.337389	0.087	0.242	4.15067e-29
ZFP36L1	8.68146e-33	-0.401541	0.643	0.787	1.91496e-28		IFITM1	1.67046e-30	1.09493	0.165	0.045	3.6847e-26		TMSB10	1.48799e-15	0.306959	1	1	3.28221e-11		AP2B1	3.67587e-33	-0.402951	0.314	0.51	8.10823e-29
HES4	1.19163e-32	-0.520786	0.76	0.854	2.62849e-28		SEM1	1.70776e-30	0.284623	0.973	0.94	3.76697e-26		ENO1	1.78733e-15	0.490487	0.993	0.972	3.94249e-11		IGFBP2	2.01206e-31	0.491379	0.492	0.312	4.4382e-27
SOX3	1.0365e-31	-0.379832	0.245	0.445	2.2863e-27		COX7B	2.26327e-30	0.28847	0.976	0.954	4.99232e-26		TUBB2A	2.4917e-15	-0.561842	0.65	0.742	5.49618e-11		PEG10	2.74736e-31	-0.700816	0.588	0.739	6.06013e-27
H3F3B	2.11714e-31	-0.262864	1	1	4.66999e-27		LITAF	4.09107e-30	-0.499099	0.406	0.581	9.02409e-26		NDUFB8	5.43051e-15	-0.41225	0.701	0.804	1.19786e-10		SNRPN	1.66472e-30	-0.351529	0.692	0.808	3.67204e-26
NPC2	5.21641e-31	-0.33828	0.606	0.767	1.15064e-26		SRSF3	4.15837e-30	0.353644	0.941	0.874	9.17253e-26		KRTCAP2	2.34546e-14	0.349511	0.579	0.393	5.17362e-10		ARF5	2.60794e-30	0.397703	0.562	0.392	5.75259e-26
CLU	3.24206e-30	-0.411415	0.557	0.725	7.15133e-26		CYR61	4.60482e-30	-0.442231	0.384	0.569	1.01573e-25		YBX1	6.11091e-14	0.264711	1	0.999	1.34794e-09		NOVA1	1.97443e-29	-0.399572	0.44	0.612	4.3552e-25
SRSF2	3.06552e-29	0.333928	0.917	0.884	6.76193e-25		KRTCAP2	3.38836e-29	0.307128	0.72	0.538	7.47404e-25		NDUFC2	2.54978e-13	-0.270474	0.796	0.873	5.6243e-09		KRTCAP2	7.06637e-29	0.366766	0.565	0.398	1.5587e-24
SFPQ	3.64626e-29	0.374867	0.869	0.784	8.04292e-25		HES4	6.93562e-29	-0.453425	0.84	0.891	1.52986e-24		BCL7A	5.95944e-13	-0.318167	0.409	0.604	1.31453e-08		NME2	1.32208e-28	0.272556	0.208	0.07	2.91623e-24
IGDCC3	1.81503e-28	-0.462137	0.396	0.566	4.00358e-24		SSBP1	2.06124e-28	0.331932	0.857	0.778	4.54669e-24		STMN4	1.19365e-12	-0.464203	0.589	0.751	2.63295e-08		RBX1	9.61861e-28	0.271258	0.987	0.971	2.12167e-23
CALM1	5.24723e-28	-0.285551	0.953	0.985	1.15743e-23		HNRNPM	3.25934e-28	0.34583	0.885	0.788	7.18946e-24		VAMP2	4.98492e-12	-0.308179	0.799	0.885	1.09957e-07		NDUFC2	4.3468e-26	-0.296183	0.877	0.915	9.58817e-22
ENY2	1.11488e-27	0.286317	0.945	0.917	2.4592e-23		BTG1	4.94631e-28	-0.351769	0.838	0.909	1.09106e-23		MALAT1	5.59618e-12	-0.302771	1	1	1.23441e-07		SEC61G	5.63379e-26	0.289869	0.982	0.951	1.2427e-21
CRB2	1.23262e-26	-0.38836	0.262	0.432	2.7189e-22		PKM	6.87885e-28	0.30054	0.975	0.963	1.51734e-23		CXXC4	6.06378e-12	-0.271613	0.189	0.353	1.33755e-07		VAMP2	4.15265e-25	-0.271722	0.971	0.979	9.15992e-21
TMEM256	5.83424e-26	-0.315928	0.548	0.696	1.28692e-21		CYP26A1	9.02126e-28	0.657629	0.298	0.142	1.98991e-23		GABARAP	2.07151e-11	0.299634	0.391	0.236	4.56935e-07		ATP5PO	7.21534e-25	-0.274073	0.972	0.979	1.59156e-20
SRM	8.96339e-26	0.309862	0.665	0.514	1.97714e-21		VAMP2	8.34708e-25	-0.298375	0.665	0.807	1.8412e-20		EIF3L	4.83598e-11	-0.252209	0.957	0.971	1.06672e-06		ATP5ME	6.25714e-24	-0.261269	0.966	0.985	1.3802e-19
IGF2BP2	3.3468e-25	-0.279015	0.269	0.437	7.38237e-21		CXCL14	2.22231e-24	0.341678	0.239	0.105	4.90197e-20		NPM1	4.87861e-11	0.291644	1	0.99	1.07612e-06		KLC1	1.55232e-23	-0.349613	0.489	0.635	3.4241e-19
HES1	3.20553e-24	-0.307674	0.226	0.394	7.07076e-20		PTMA	1.45707e-23	0.325142	0.999	0.997	3.214e-19		HNRNPA2B1	5.59462e-11	0.258995	0.984	0.975	1.23406e-06		HNRNPM	1.46137e-22	0.275623	0.899	0.817	3.22348e-18
FGFBP3	5.19608e-24	-0.568184	0.649	0.727	1.14615e-19		SNRPG	2.75576e-23	0.259911	0.967	0.956	6.07865e-19		KLC1	6.55139e-11	-0.317246	0.433	0.596	1.44511e-06		SRSF3	2.82343e-22	0.2742	0.952	0.902	6.22791e-18
NDUFA11	2.00817e-23	-0.263452	0.806	0.883	4.42962e-19		SFPQ	7.58466e-23	0.332996	0.689	0.556	1.67302e-18		MAPK6	8.83948e-11	-0.259214	0.227	0.384	1.94981e-06		SFPQ	4.92274e-22	0.316541	0.661	0.524	1.08586e-17
CXCL14	6.17625e-23	0.293494	0.352	0.202	1.36236e-18		ZFP36L1	3.02539e-22	-0.371981	0.673	0.775	6.67341e-18		SFPQ	1.32497e-10	0.295232	0.694	0.549	2.92262e-06		PCBP2	2.78208e-21	0.256313	0.948	0.906	6.13671e-17
FAM181A	9.14721e-23	-0.268724	0.236	0.392	2.01769e-18		MT-ND3	4.70297e-22	-0.26199	0.958	0.981	1.03738e-17		ATP5ME	2.03135e-10	-0.257092	0.939	0.951	4.48076e-06		GABARAP	1.38838e-20	0.288202	0.308	0.173	3.06249e-16
MLLT11	1.12681e-22	0.29788	0.954	0.905	2.48551e-18		LDHA	6.59365e-22	0.404692	0.613	0.462	1.45443e-17		TOMM5	3.20627e-10	0.282314	0.302	0.166	7.07239e-06		TOMM5	1.45229e-18	0.276074	0.281	0.158	3.20345e-14
IFITM1	1.20646e-22	0.277809	0.163	0.054	2.6612e-18		SRSF2	7.35975e-22	0.3391	0.786	0.677	1.62341e-17		ARF5	3.53539e-10	0.310324	0.555	0.411	7.79835e-06		NDUFB8	1.63605e-18	-0.275367	0.781	0.826	3.6088e-14
SELENOH	1.67656e-22	0.253029	0.898	0.818	3.69816e-18		PDCD5	1.49361e-21	0.283294	0.819	0.706	3.2946e-17		ENY2	3.59095e-10	0.29483	0.881	0.82	7.92091e-06		TNRC6B	5.63058e-18	-0.322679	0.437	0.571	1.24199e-13
SSBP1	3.25866e-22	0.258833	0.897	0.85	7.18795e-18		CCT5	2.19133e-20	0.333855	0.757	0.647	4.83363e-16		DAAM1	4.28184e-10	-0.338177	0.538	0.673	9.44488e-06		NNAT	1.678e-17	0.427721	0.43	0.281	3.70133e-13
TXN	4.00798e-21	0.25338	0.977	0.972	8.8408e-17		SNRPD1	3.73581e-20	0.312216	0.926	0.89	8.24045e-16		BHLHE22	1.29558e-09	-0.256001	0.095	0.212	2.85778e-05		BCL7A	2.77774e-17	-0.269279	0.302	0.436	6.12713e-13
NDUFB8	8.32553e-21	-0.259653	0.685	0.787	1.83645e-16		RANBP1	2.61905e-19	0.35343	0.845	0.787	5.77711e-15		SNRPN	1.34656e-09	-0.285161	0.572	0.695	2.97025e-05		JUN	5.50172e-17	-0.395679	0.799	0.84	1.21357e-12
CHCHD2	8.93009e-21	0.597731	0.592	0.498	1.9698e-16		NCL	2.66112e-19	0.301547	0.941	0.898	5.86989e-15		PGK1	1.67482e-09	0.36826	0.828	0.754	3.69432e-05		GPM6A	6.12014e-17	-0.343624	0.538	0.668	1.34998e-12
CKB	3.17274e-20	-0.258188	0.933	0.989	6.99842e-16		PLP1	4.06627e-19	-0.257493	0.148	0.281	8.96939e-15		HNRNPM	2.60411e-09	0.294796	0.867	0.778	5.74414e-05		YAF2	6.42474e-16	-0.255278	0.208	0.331	1.41717e-11
DYNC1I2	3.4007e-20	-0.267917	0.612	0.735	7.50127e-16		MT-ATP6	4.33257e-19	-0.253296	0.998	0.998	9.55678e-15		TMSB4X	3.28298e-09	0.265813	1	1	7.24161e-05		MEG3	1.62516e-15	0.386075	0.303	0.176	3.58477e-11
CYP26A1	1.09539e-19	0.559213	0.334	0.201	2.41621e-15		FILIP1	9.47649e-19	-0.33123	0.328	0.465	2.09033e-14		PPDPF	3.68976e-09	0.257059	0.996	0.965	8.13886e-05		ENO1	4.93125e-14	0.286439	0.993	0.986	1.08774e-09
PPP1R1A	7.39947e-19	-0.284192	0.302	0.44	1.63217e-14		PSMA4	3.32454e-18	0.259017	0.913	0.846	7.33326e-14		SEM1	3.85824e-09	0.259058	0.933	0.89	8.5105e-05		CRABP1	5.98974e-14	0.309543	0.975	0.957	1.32122e-09
PLP1	1.29252e-18	-0.252403	0.116	0.232	2.85105e-14		HMGB1	3.53201e-18	0.292896	0.999	0.996	7.79092e-14		VKORC1	1.6285e-08	-0.279444	0.383	0.517	0.000359215		NTM	9.67346e-09	-0.292247	0.298	0.38	0.000213377
IFI16	2.16669e-18	0.365442	0.15	0.057	4.77929e-14		SOX3	7.92595e-18	-0.286505	0.253	0.393	1.74831e-13		CRABP1	2.73388e-08	-0.441954	0.977	0.981	0.00060304		TAGLN3	1.64407e-08	0.274087	0.808	0.776	0.000362649
BTG1	3.13344e-18	-0.258918	0.82	0.909	6.91175e-14		HDAC2	1.00321e-17	0.313262	0.806	0.742	2.21288e-13		TUBB2B	5.51838e-08	-0.291776	0.999	0.999	0.00121724
PPIB	3.60069e-18	0.261216	0.82	0.727	7.9424e-14		CRB2	1.72848e-17	-0.308915	0.275	0.408	3.81269e-13		PCBP4	5.90485e-08	-0.28068	0.733	0.817	0.00130249
CYR61	4.10303e-18	-0.272694	0.409	0.546	9.05047e-14		DBN1	1.87412e-17	0.25866	0.603	0.481	4.13394e-13		STMN2	6.49256e-08	-0.386018	0.844	0.89	0.00143213
TTYH1	2.11706e-17	-0.27525	0.777	0.854	4.6698e-13		NDUFB6	2.43614e-17	0.257534	0.746	0.632	5.37365e-13		C1QBP	8.60069e-08	0.26322	0.709	0.596	0.00189714
ARL4A	3.24779e-17	-0.29465	0.557	0.669	7.16398e-13		FAM181A	1.38944e-16	-0.252655	0.261	0.393	3.06483e-12		TAGLN3	1.29927e-07	0.309336	0.955	0.94	0.00286592
TOP2A	2.6481e-16	-0.297819	0.851	0.903	5.84119e-12		BCAN	2.54866e-16	-0.418197	0.073	0.17	5.62184e-12		IGDCC3	2.16524e-07	-0.338044	0.423	0.535	0.00477609
CTGF	2.85763e-16	-0.361495	0.425	0.548	6.30336e-12		PTPRZ1	5.58426e-16	-0.281995	0.327	0.456	1.23178e-11		CDKN1C	3.25381e-07	-0.32181	0.363	0.501	0.00717726
PGK1	4.64853e-16	0.351756	0.798	0.733	1.02537e-11		LMO4	8.81829e-16	-0.266861	0.45	0.579	1.94514e-11		CLU	7.05515e-07	-0.300793	0.488	0.592	0.0155623
HMGA1	1.79797e-15	-0.269721	0.816	0.89	3.96597e-11		EGR1	4.55262e-15	-0.254322	0.584	0.714	1.00422e-10		PPP1R14C	7.84164e-07	0.269723	0.244	0.143	0.0172971
MANF	2.25265e-15	0.262288	0.673	0.557	4.96889e-11		ACAT2	5.11367e-15	0.463713	0.658	0.581	1.12797e-10		CYP26A1	9.18869e-07	0.400231	0.187	0.099	0.0202684
TUBB2A	1.5836e-14	-0.340758	0.643	0.719	3.4931e-10		H2AFZ	5.68701e-15	0.352199	0.996	0.997	1.25444e-10		ARL4A	9.86692e-07	-0.350573	0.394	0.507	0.0217645
HSP90AA1	2.58725e-14	-0.25615	0.999	0.999	5.70696e-10		HMGN2	8.14613e-15	0.271247	0.99	0.987	1.79687e-10		NHLH2	1.47722e-06	-0.301859	0.23	0.345	0.0325845
HIST2H2AC	1.49708e-13	-0.275815	0.348	0.462	3.30226e-09		TTYH1	8.55843e-15	-0.301527	0.908	0.939	1.88782e-10		NSG1	1.55813e-06	-0.257304	0.355	0.48	0.0343693
PEG10	1.50459e-13	-0.283804	0.541	0.642	3.31883e-09		BIRC5	1.61985e-14	0.271254	0.342	0.225	3.57307e-10		TFAP2B	1.90825e-06	0.336365	0.628	0.536	0.0420921
SFRP1	1.67382e-12	-0.291858	0.245	0.347	3.69211e-08		AL139246.5	2.59162e-14	-0.331804	0.238	0.358	5.71659e-10		PEG10	2.12471e-06	-0.565451	0.455	0.557	0.0468668
COL3A1	4.70557e-12	0.427584	0.166	0.09	1.03795e-07		CLU	1.15827e-13	-0.323597	0.8	0.878	2.55492e-09		BTG1	8.11681e-06	-0.265929	0.972	0.962	0.179041
ARPC5	4.14871e-10	0.376493	0.767	0.707	9.15122e-06		IFI27L2	2.18667e-13	-0.250519	0.529	0.646	4.82336e-09		NPTX2	8.92286e-06	0.274003	0.306	0.214	0.196821
B2M	1.10838e-08	0.573919	0.778	0.754	0.000244485		HMGB3	5.22476e-13	0.259125	0.692	0.6	1.15248e-08		CTNNB1	1.17725e-05	-0.278619	0.278	0.38	0.259678
FAM162A	1.33816e-08	0.40769	0.503	0.432	0.000295172		HSPD1	5.55034e-13	0.274808	0.962	0.951	1.22429e-08		RBP1	2.32334e-05	0.285945	0.637	0.539	0.512481
BNIP3	2.43164e-08	0.467065	0.556	0.497	0.000536372		HES1	9.69206e-13	-0.322151	0.358	0.489	2.13787e-08		CLDN5	9.5903e-05	0.283278	0.133	0.071	1
ISG15	1.91391e-07	0.8371	0.301	0.243	0.0042217		STMN4	1.67577e-12	-0.292318	0.294	0.412	3.69642e-08		NEFL	0.000196877	-0.379563	0.365	0.449	1
IFITM3	5.51058e-07	0.537188	0.292	0.243	0.0121552		CTGF	3.33866e-12	-0.317211	0.485	0.598	7.36443e-08		PDPN	0.000206777	0.281188	0.526	0.462	1
IFI6	0.00607069	1.22506	0.431	0.573	1		FABP7	3.63176e-11	-0.468745	0.361	0.474	8.01094e-07		NEFM	0.000341899	-0.459047	0.418	0.502	1
IFI27	0.0107598	0.863717	0.139	0.117	1		TUBB2A	7.13704e-11	-0.479893	0.721	0.741	1.57429e-06		FGFBP3	0.00046103	-0.275916	0.287	0.37	1
							NASP	3.95064e-10	0.252695	0.768	0.692	8.71433e-06		AKAP12	0.000547877	-0.254371	0.272	0.352	1
							JUN	6.3417e-10	-0.290423	0.775	0.811	1.39885e-05		LDHA	0.000790862	0.290116	0.538	0.459	1
							H1F0	1.41886e-09	-0.328482	0.539	0.603	3.12973e-05		LHX5-AS1	0.00113502	-0.347657	0.211	0.278	1
							SAT1	1.80156e-09	-0.349922	0.263	0.343	3.97388e-05		SOX11	0.00515551	-0.290797	0.96	0.95	1
							CHCHD2	7.06035e-09	0.406617	0.621	0.576	0.000155737		IGFBP5	0.0300332	0.387251	0.106	0.074	1
							CRABP1	7.5897e-09	0.290136	0.847	0.817	0.000167414		ISG15	0.118704	0.289441	0.139	0.178	1
							TUBB2B	9.62992e-09	-0.315251	0.975	0.982	0.000212417		GADD45G	0.936442	0.334862	0.599	0.647	1
							IGDCC3	2.85477e-08	-0.29213	0.34	0.417	0.000629705
							IFI6	4.41752e-08	0.51646	0.535	0.683	0.000974418
							ARL4A	1.4479e-07	-0.262048	0.518	0.592	0.00319377
							C1orf61	3.98443e-07	-0.722298	0.54	0.573	0.00878887
							RSPO3	9.08706e-07	0.393923	0.133	0.081	0.0200442
							FABP5	7.98467e-06	0.30106	0.727	0.679	0.176126
							IFITM3	0.00473614	0.410991	0.302	0.279	1
							FGFBP3	0.00975602	-0.289971	0.675	0.666	1
							TPM1	0.0110122	0.276275	0.535	0.494	1
							PTN	0.244042	-0.461244	0.598	0.591	1
							CCL2	0.244855	0.274405	0.181	0.17	1
							IFI27	0.332382	0.361038	0.129	0.148	1
							ISG15	0.430932	0.870325	0.355	0.373	1

## Sheet: Orgs. wo MG +-RV
Dividing Cells							Radial Glia							IPC							Excitatory Neurons
Gene	p_val	avg_log2FC	pct.1	pct.2	p_val_adj		Gene	p_val	avg_log2FC	pct.1	pct.2	p_val_adj		Gene	p_val	avg_log2FC	pct.1	pct.2	p_val_adj		Gene	p_val	avg_log2FC	pct.1	pct.2	p_val_adj
SOX2	1.26e-70	-0.993256	0.483	0.91	2.78e-66		CARD16	4.55e-43	-1.39496	0.125	0.449	1e-38		NOVA1	6.03e-15	0.665481	0.752	0.48	1.33e-10		MEIS2	2.86e-19	-1.10264	0.407	0.651	6.31e-15		Organoids without microglia
IFITM3	1.57e-63	1.46625	0.577	0.148	3.47e-59		CLU	3.23e-39	-1.00573	0.821	0.923	7.13e-35		RBP1	1.3e-13	-1.54772	0.514	0.706	2.86e-09		OCIAD2	9.63e-14	-0.587824	0.22	0.462	2.12e-09		Exposed to RV (positive log2FC) or not exposed to RV
IFI6	3.99e-63	2.45902	0.646	0.271	8.8e-59		NFIA	2.83e-37	-0.810745	0.325	0.643	6.25e-33		NUDT11	5.46e-13	0.58674	0.673	0.367	1.2e-08		IGDCC3	9.44e-13	0.400954	0.37	0.151	2.08e-08		p_val	p-value
ZIC1	6.39e-61	-0.638209	0.114	0.451	1.41e-56		MT-ND4	3.6e-35	-0.505948	0.995	0.998	7.95e-31		MT-ND4	9.51e-13	-0.488779	1	1	2.1e-08		GAPDH	1.74e-12	0.32736	1	1	3.83e-08		avg_log2FC	average log fold change
IFI27	1.32e-59	2.37202	0.465	0.036	2.92e-55		MAP1B	7.86e-34	0.538804	0.997	0.989	1.73e-29		AKAP12	3.78e-12	0.680189	0.518	0.226	8.33e-08		CHCHD2	4.34e-12	0.549896	0.718	0.49	9.58e-08		pct1	percentage of cells in the cluster where the gene is expressed
TUBB2A	1.58e-58	-0.859285	0.536	0.85	3.48e-54		NFIB	2.12e-32	-0.64033	0.242	0.548	4.68e-28		PCBP4	6.4e-12	0.55718	0.928	0.774	1.41e-07		MAP1LC3A	6.04e-12	-0.501585	0.297	0.51	1.33e-07		pct2	percentage of cells on average in all other clusters
COL3A1	5.96e-52	0.967714	0.475	0.067	1.32e-47		SLC25A6	5.09e-31	0.423523	0.997	0.98	1.12e-26		HOTAIRM1	6.95e-12	-0.494863	0.101	0.348	1.53e-07		MEG3	2.8e-10	-1.08809	0.331	0.505	6.18e-06		p_val_adj	adjusted p value
C12orf75	1.64e-51	-0.715936	0.305	0.652	3.62e-47		FHL1	4.59e-29	-0.659643	0.435	0.673	1.01e-24		HSPB1	1.92e-11	-0.607556	0.475	0.729	4.23e-07		MT-ND4	1.16e-09	-0.348941	1	1	2.55e-05
IFITM1	4.39e-51	0.888542	0.4	0.02	9.68e-47		MAP7	8.34e-29	-0.590832	0.108	0.358	1.84e-24		NKAIN4	2.17e-11	0.5117	0.701	0.403	4.78e-07		CRNDE	1.23e-09	0.454746	0.788	0.67	2.7e-05
PCSK1N	3.95e-49	-0.649246	0.369	0.724	8.71e-45		NRP2	1.9e-28	-0.473826	0.081	0.324	4.19e-24		LHX1	6.46e-11	0.812607	0.396	0.149	1.42e-06		NNAT	1.33e-09	-0.887015	0.424	0.572	2.94e-05
BST2	4.57e-48	1.21432	0.418	0.043	1.01e-43		MT-ND5	1.08e-27	-0.590671	0.959	0.977	2.39e-23		RBMX	9.2e-11	0.516958	0.928	0.801	2.03e-06		NFIB	2.31e-09	-0.515001	0.071	0.225	5.09e-05
IFI16	6.4e-47	0.864838	0.419	0.049	1.41e-42		NAP1L1	4.6e-27	0.539145	0.985	0.937	1.01e-22		SSTR2	1.7e-10	-0.683216	0.169	0.416	3.76e-06		TCEAL2	2.74e-09	-0.371634	0.314	0.529	6.05e-05
CYP26A1	1.23e-44	-0.88866	0.094	0.363	2.71e-40		SCG2	7.78e-27	-0.76641	0.054	0.268	1.72e-22		NFIA	1.77e-10	-0.850313	0.144	0.371	3.91e-06		MT-ND2	6.94e-09	-0.484694	1	0.998	0.00015303
FZD3	1.48e-44	-0.557572	0.357	0.722	3.26e-40		CHCHD2	8.45e-27	0.649824	0.729	0.412	1.86e-22		NFIB	5.23e-10	-0.58606	0.112	0.335	1.15e-05		ZNF503	1.28e-08	-0.45195	0.082	0.23	0.000281748
CCDC80	3.61e-43	-0.398906	0.045	0.26	7.96e-39		SOCS2	9.15e-27	0.564763	0.456	0.202	2.02e-22		ZNF503	5.78e-10	-0.483042	0.054	0.244	1.28e-05		IRX3	2.15e-08	0.353557	0.449	0.27	0.0004738
ARPC5	1.72e-42	1.13459	0.823	0.666	3.8e-38		HNRNPA1	1.04e-26	0.546164	0.997	0.994	2.29e-22		LHX1-DT	6.12e-10	0.493594	0.324	0.095	1.35e-05		GATA3	4.85e-08	-0.789133	0.068	0.201	0.00107037
GPNMB	2.23e-41	0.813933	0.411	0.072	4.91e-37		LINC00623	1.08e-26	-0.57955	0.176	0.429	2.37e-22		IGDCC3	1.01e-09	0.604745	0.615	0.367	2.22e-05		TUBB2A	9.98e-08	-0.348685	0.955	0.967	0.00220029
IDH2	2.12e-40	0.953267	0.879	0.751	4.67e-36		RACK1	1.45e-25	0.380942	1	1	3.2e-21		POU3F2	2.46e-09	0.451731	0.453	0.217	5.42e-05		C1orf216	1.39e-07	-0.260996	0.079	0.213	0.0030651
ISG15	8.07e-40	1.2559	0.538	0.195	1.78e-35		LYPD1	1.48e-25	-0.667997	0.339	0.598	3.26e-21		TTR	3.49e-09	-0.374016	0.82	0.941	7.69e-05		TCEAL5	1.45e-07	-0.265403	0.107	0.254	0.00319924
HES4	1.05e-38	-0.746912	0.557	0.821	2.32e-34		NPM1	1.49e-25	0.438922	0.995	0.977	3.28e-21		CDKN1C	3.93e-09	0.44769	0.658	0.385	8.67e-05		HOXB2	2.59e-07	-0.2521	0.062	0.187	0.00571358
COL11A1	2.04e-38	0.790504	0.517	0.173	4.5e-34		PEA15	1.74e-25	-0.636199	0.545	0.764	3.83e-21		ZIC1	7.41e-09	-0.316871	0.09	0.285	0.000163503		BEX2	2.77e-07	-0.348433	0.706	0.816	0.00610315
TPM2	3.09e-38	0.725067	0.506	0.166	6.81e-34		PSRC1	1.61e-24	0.5314	0.449	0.203	3.56e-20		TMSB4X	8.2e-09	-0.552061	1	1	0.000180909		MT-ND1	3.27e-07	-0.363005	0.997	0.993	0.00720228
TFAP2B	6.07e-38	0.814416	0.485	0.137	1.34e-33		SRP14	2.31e-24	-0.438837	0.998	0.997	5.1e-20		CPLX2	8.99e-09	0.437757	0.367	0.145	0.000198197		PAFAH1B3	3.67e-07	0.289208	0.986	0.952	0.00810416
GPM6B	4.14e-37	-0.695404	0.434	0.724	9.14e-33		RBP1	2.32e-24	-0.97763	0.303	0.534	5.11e-20		MT-ND5	1.49e-08	-0.52194	0.921	0.982	0.000328357		HOTAIRM1	3.98e-07	-0.277552	0.11	0.254	0.00878083
HOTAIRM1	4.65e-37	-0.394892	0.068	0.287	1.03e-32		PCSK1N	5.41e-24	-0.524901	0.658	0.823	1.19e-19		OCIAD2	1.86e-08	-0.452556	0.151	0.353	0.000411085		TMEM97	5.62e-07	0.287059	0.379	0.222	0.0124063
COTL1	3.02e-36	-0.676848	0.331	0.619	6.67e-32		SYNPR	6.54e-24	-0.603352	0.083	0.296	1.44e-19		NTM	2.51e-08	-0.736636	0.115	0.303	0.000552613		NR2F2	7.15e-07	0.339029	0.76	0.615	0.0157812
CNN3	8.3e-36	-0.532434	0.867	0.962	1.83e-31		PTGER3	2.09e-23	-0.587418	0.05	0.239	4.6e-19		CCND1	4.52e-08	0.773728	0.619	0.394	0.000997197		MT-ND3	9.86e-07	-0.31425	0.994	0.976	0.0217551
LMO4	1.05e-35	1.01904	0.725	0.489	2.33e-31		MEIS2	2.16e-23	-0.616716	0.279	0.516	4.77e-19		CNIH1	4.59e-08	0.335435	0.432	0.199	0.00101142		GSTP1	2.26e-06	-0.270609	0.932	0.976	0.0497824
UBA52	1.17e-35	0.348804	1	0.998	2.59e-31		EEF1D	2.22e-23	0.400804	0.979	0.964	4.9e-19		NHLH2	5.35e-08	0.523563	0.446	0.222	0.00118074		SCG5	2.53e-06	-0.348632	0.113	0.239	0.055797
TUBB2B	1.37e-35	-0.559571	0.843	0.962	3.02e-31		BEX3	2.4e-23	-0.382598	0.998	1	5.3e-19		TFAP2A	5.72e-08	-0.550156	0.173	0.38	0.00126241		XIST	2.71e-06	-0.364607	0.059	0.167	0.0597252
CALM2	2.01e-35	-0.513803	0.999	1	4.43e-31		MALAT1	2.74e-23	-0.521971	1	1	6.05e-19		NRP2	1.28e-07	-0.464012	0.04	0.181	0.00281514		CCDC28B	3.16e-06	-0.352125	0.568	0.658	0.0697908
RAB32	2.67e-35	0.975096	0.43	0.121	5.89e-31		ECHDC2	4.44e-23	-0.443549	0.066	0.269	9.79e-19		SRP14	1.49e-07	-0.279953	1	1	0.00327858		POU2F2	7.98e-06	0.457639	0.446	0.311	0.176097
BEX1	4.17e-35	-0.60413	0.42	0.738	9.21e-31		PAX3	5.22e-23	0.409276	0.477	0.219	1.15e-18		MT-ATP6	1.53e-07	-0.37479	0.993	1	0.0033685		CD24	8e-06	0.269981	0.972	0.978	0.176357
ZIC2	1.5e-34	-0.406438	0.122	0.37	3.31e-30		TMSB4X	5.53e-23	-0.362835	1	1	1.22e-18		EPHA4	1.77e-07	0.302179	0.281	0.095	0.00389505		MT-ATP6	8.5e-06	-0.333574	1	0.998	0.187479
LRRC17	4.63e-34	0.619231	0.323	0.036	1.02e-29		ALDH9A1	3.35e-22	-0.5231	0.328	0.562	7.39e-18		GSTP1	3.8e-07	-0.379789	0.971	0.995	0.00838261		NUDC	1.14e-05	-0.260335	0.774	0.84	0.25052
TRPM3	1.93e-33	-0.308916	0.042	0.222	4.26e-29		UBA52	4.55e-22	0.293808	0.997	1	1e-17		LHX5-AS1	4.94e-07	0.637711	0.291	0.109	0.0109002		NFIA	1.21e-05	-0.421911	0.099	0.208	0.267569
CTGF	2.08e-33	-0.57891	0.301	0.614	4.59e-29		BTF3	7.82e-22	0.307395	1	0.995	1.72e-17		RACK1	7.76e-07	0.255689	1	1	0.0171187		LY6H	1.25e-05	-0.396392	0.551	0.653	0.275852
IGFBP5	7.3e-33	-0.411239	0.132	0.381	1.61e-28		FEZ1	2.01e-21	-0.497738	0.795	0.892	4.43e-17		MT-CO2	9.32e-07	-0.312708	1	1	0.0205527		NHLH2	1.38e-05	0.313636	0.379	0.246	0.304292
IGFBP7	2.27e-32	-0.367498	0.13	0.377	5e-28		SUB1	2.6e-21	-0.524758	0.904	0.956	5.74e-17		NME3	1.07e-06	-0.319066	0.223	0.425	0.0236292		ZFHX3	1.39e-05	0.317854	0.523	0.368	0.306753
NTRK2	3e-32	-0.589357	0.286	0.567	6.63e-28		TAGLN2	3.57e-21	-0.501608	0.167	0.387	7.88e-17		DYNLL1	1.17e-06	-0.324224	0.989	0.991	0.0257836		NPDC1	1.46e-05	-0.345209	0.466	0.557	0.321305
EIF4A2	9.98e-32	-0.52497	0.773	0.913	2.2e-27		ATP1B1	4.63e-21	-0.508047	0.327	0.551	1.02e-16		RAB3B	1.2e-06	-0.251421	0.058	0.199	0.0264204		ATP1B1	1.61e-05	-0.338013	0.686	0.761	0.354996
CFH	2.23e-31	0.532772	0.266	0.009	4.92e-27		MT-CO1	6.51e-21	-0.388952	1	0.998	1.44e-16		SKIL	1.21e-06	0.370921	0.453	0.249	0.0267218		JUN	1.91e-05	-0.388866	0.746	0.833	0.420283
CRABP2	3.41e-31	-0.623399	0.204	0.469	7.53e-27		LAMP5	8.29e-21	-0.425698	0.066	0.252	1.83e-16		EEF2	1.33e-06	0.287507	0.993	1	0.0293877		CRABP2	4.58e-05	0.390275	0.311	0.191	1
CLU	5.34e-31	-0.722171	0.455	0.713	1.18e-26		HOTAIRM1	1.37e-20	-0.476271	0.196	0.423	3.02e-16		CRNDE	1.36e-06	0.329786	0.835	0.661	0.0300381		IGFBP5	9.15e-05	-0.563408	0.167	0.275	1
LY6H	8.82e-31	-0.402507	0.19	0.457	1.95e-26		SOX3	1.54e-20	0.484259	0.443	0.214	3.4e-16		KPNA2	1.38e-06	0.363635	0.831	0.643	0.0305194		FGF12	9.88e-05	-0.256993	0.102	0.199	1
ACTB	1.16e-30	-0.446746	1	0.998	2.56e-26		DEGS1	2.19e-20	-0.403543	0.197	0.424	4.83e-16		HNRNPA1	1.49e-06	0.282712	1	1	0.0328905		NTM	0.000120769	-0.327016	0.398	0.524	1
SLC25A6	1.66e-30	0.367554	1	0.996	3.67e-26		IGDCC3	2.19e-20	0.527403	0.455	0.221	4.83e-16		MDK	1.64e-06	-0.287009	0.658	0.833	0.0362608		MT-ND5	0.000125274	-0.304217	0.986	0.983	1
SUMO2	1.69e-30	-0.330939	0.997	0.998	3.73e-26		FAM198B	6.82e-20	-0.290565	0.033	0.191	1.51e-15		ZIC2	1.75e-06	-0.349898	0.086	0.235	0.0386645		C1orf122	0.000184698	-0.27922	0.613	0.675	1
ITGB1	4.82e-30	0.733864	0.73	0.525	1.06e-25		CNN3	8.57e-20	-0.418393	0.931	0.981	1.89e-15		PCSK1N	1.87e-06	-0.309638	0.719	0.864	0.0411764		SNRPN	0.00025203	-0.275579	0.879	0.892	1
TTYH1	6.79e-30	-0.607063	0.536	0.816	1.5e-25		CCDC28B	9.84e-20	-0.505194	0.411	0.615	2.17e-15		MT-CO1	1.91e-06	-0.264246	1	1	0.0421369		FOS	0.000296148	-0.329298	0.46	0.572	1
HSP90AA1	6.94e-30	-0.488914	0.998	1	1.53e-25		DYNLL1	1.16e-19	-0.35893	0.997	1	2.56e-15		GREM2	2.38e-06	0.385655	0.27	0.104	0.0525155		S100B	0.000417129	-0.277305	0.107	0.196	1
HLA-A	7.7e-30	0.834166	0.597	0.343	1.7e-25		ATP6V0E1	1.3e-19	-0.471509	0.712	0.831	2.86e-15		SPSB4	2.43e-06	0.275457	0.342	0.154	0.0537068		NES	0.000509117	0.269407	0.376	0.261	1
LY6E	1.49e-29	0.731902	0.547	0.296	3.28e-25		NR2F1	1.74e-19	0.458835	0.91	0.8	3.84e-15		NAP1L1	3.12e-06	0.338636	0.986	0.977	0.0687449		BEX5	0.000540932	-0.292774	0.319	0.421	1
SRSF9	3.71e-29	-0.410952	0.845	0.955	8.18e-25		CADPS2	3.71e-19	-0.273877	0.035	0.189	8.19e-15		CELF2	3.31e-06	0.255531	0.45	0.24	0.0729929		MIF	0.000544275	0.289347	0.952	0.94	1
BTF3	4.2e-29	0.326957	1	0.996	9.26e-25		PLEKHA5	4.34e-19	-0.425466	0.184	0.393	9.56e-15		NSG1	3.62e-06	0.478	0.529	0.33	0.0798589		PCBP4	0.000708126	0.314762	0.551	0.45	1
TMSB4X	4.56e-29	-0.491623	1	1	1.01e-24		BCAN	5.08e-19	-0.878655	0.081	0.26	1.12e-14		SOD1	3.92e-06	-0.304652	0.881	0.95	0.0864211		TNNT1	0.000759804	-0.311262	0.079	0.153	1
B2M	4.95e-29	1.00332	0.817	0.733	1.09e-24		H3F3B	6.09e-19	-0.341779	1	1	1.34e-14		AC022639.1	4.02e-06	0.283549	0.237	0.086	0.0885938		CITED2	0.00108834	0.259851	0.655	0.56	1
ID1	2.75e-28	-0.578144	0.376	0.65	6.08e-24		HNRNPM	7.03e-19	0.444419	0.902	0.812	1.55e-14		FOXP2	4.02e-06	-0.314065	0.169	0.339	0.0886132		CELF4	0.001209	-0.379815	0.573	0.627	1
ACTG1	4.22e-28	-0.479417	0.999	1	9.3e-24		VIM	7.76e-19	0.420517	0.997	0.991	1.71e-14		TMEM97	4.09e-06	0.39001	0.64	0.443	0.0902523		C1orf61	0.00134952	-0.29126	0.503	0.589	1
MGST1	6.65e-28	-0.506563	0.225	0.462	1.47e-23		AC093673.1	1.3e-18	-0.342092	0.116	0.311	2.86e-14		CYP26A1	4.82e-06	-0.735841	0.079	0.222	0.106235		MT-ND4L	0.00141165	-0.258226	0.59	0.639	1
RARRES2	6.76e-28	-0.801021	0.36	0.587	1.49e-23		EIF4A2	1.48e-18	-0.394456	0.815	0.926	3.27e-14		CHCHD2	5.16e-06	0.405927	0.766	0.588	0.113816		SQLE	0.00174299	0.257736	0.616	0.502	1
C2orf80	7.26e-28	0.471548	0.32	0.063	1.6e-23		SFRP2	1.71e-18	0.419761	0.477	0.249	3.78e-14		BHLHE22	5.39e-06	0.330006	0.349	0.172	0.118788		RTN1	0.00350389	-0.250807	0.839	0.823	1
MX1	2.95e-27	0.476203	0.254	0.02	6.5e-23		LITAF	1.76e-18	-0.680556	0.483	0.638	3.88e-14		TTC3	6.32e-06	-0.365978	0.906	0.968	0.139506		LHX5-AS1	0.00356373	0.334991	0.35	0.263	1
COX7A2	4.74e-27	0.438083	0.997	0.993	1.05e-22		MT-ATP6	2.05e-18	-0.396375	0.995	0.998	4.52e-14		SHOX2	6.8e-06	0.293452	0.209	0.068	0.150096		LMO4	0.00361716	-0.280309	0.477	0.545	1
TPM4	4.83e-27	0.528111	0.839	0.668	1.07e-22		FGFBP3	2.46e-18	0.359027	0.738	0.479	5.44e-14		GFRA1	7.14e-06	0.255969	0.194	0.059	0.1574		ELAVL4	0.00388519	-0.261268	0.732	0.775	1
MDK	7.06e-27	0.779383	0.933	0.922	1.56e-22		TMEM97	2.62e-18	0.518928	0.571	0.347	5.78e-14		HSPE1	7.34e-06	-0.331039	0.842	0.9	0.161836		TSHZ2	0.00854948	-0.403584	0.302	0.368	1
SDCBP	1.05e-26	-0.40857	0.417	0.666	2.33e-22		IGFBP7	4.64e-18	-0.662	0.232	0.432	1.02e-13		FTH1	7.55e-06	-0.253286	1	1	0.166488		LHX1	0.00864383	0.364355	0.35	0.27	1
TBX3	1.09e-26	0.412116	0.235	0.011	2.41e-22		ITM2B	5.23e-18	-0.472422	0.648	0.803	1.15e-13		LMO1	7.64e-06	0.410604	0.345	0.167	0.168598		CLU	0.00963335	-0.274602	0.48	0.553	1
ID2	1.2e-26	-0.70166	0.468	0.713	2.65e-22		ANXA6	7.89e-18	-0.34944	0.239	0.463	1.74e-13		NELL2	7.7e-06	0.283671	0.309	0.145	0.169802		SHOX2	0.0133719	-0.285744	0.105	0.16	1
RPGRIP1L	2.63e-26	0.639969	0.424	0.157	5.79e-22		SNRPB	1.1e-17	0.429446	0.815	0.665	2.43e-13		NME6	9.27e-06	0.278646	0.363	0.186	0.204402		AC027031.2	0.023343	-0.257292	0.246	0.313	1
SDC2	3.95e-26	-0.403874	0.26	0.516	8.7e-22		EFEMP1	1.24e-17	-0.396613	0.071	0.238	2.74e-13		ACIN1	1.18e-05	0.321796	0.558	0.362	0.259614		VIM	0.10756	0.463229	0.839	0.835	1
SCIN	4.09e-26	0.441696	0.245	0.02	9.03e-22		PTPMT1	1.6e-17	-0.320496	0.172	0.377	3.53e-13		MT-CYB	1.33e-05	-0.310701	0.993	1	0.293431		FABP7	0.1665	-0.29126	0.144	0.175	1
ZFP36L1	4.89e-26	-0.489786	0.536	0.796	1.08e-21		SOX2	2.22e-17	-0.367104	0.958	0.977	4.91e-13		JAG1	1.34e-05	0.40163	0.281	0.122	0.294903		RBP1	0.310299	-0.367199	0.432	0.426	1
PCOLCE	5.51e-26	0.540619	0.331	0.083	1.22e-21		SYT1	2.7e-17	-0.697884	0.307	0.491	5.96e-13		YBX1	1.43e-05	-0.345398	1	1	0.315975		S100A6	0.339202	-0.490738	0.116	0.134	1
NR2F2	6.94e-26	-0.473719	0.444	0.726	1.53e-21		ARL6IP5	3.32e-17	-0.384675	0.636	0.786	7.33e-13		HOXA3	1.51e-05	-0.252754	0.018	0.109	0.332039		NEFL	0.776267	-0.25201	0.559	0.526	1
OAS1	7.99e-26	0.374413	0.234	0.013	1.76e-21		PLP1	4.85e-17	0.41691	0.343	0.147	1.07e-12		IGF2BP2	1.9e-05	0.31602	0.428	0.258	0.418622
NR2F1	1.33e-25	-0.439205	0.538	0.848	2.94e-21		TMSB15A	4.89e-17	0.436913	0.789	0.624	1.08e-12		LAMTOR2	2.17e-05	-0.360898	0.561	0.683	0.47792
SSR4	1.96e-25	0.492634	0.917	0.827	4.33e-21		ANXA2	5.35e-17	-0.521207	0.407	0.64	1.18e-12		LHX5	2.36e-05	0.321578	0.205	0.072	0.521611
DOK5	2.73e-25	0.452569	0.597	0.305	6.02e-21		EEF1B2	5.42e-17	0.3623	0.961	0.917	1.2e-12		IDH1	2.37e-05	0.300124	0.612	0.412	0.523446
CENPV	3.66e-25	-0.517334	0.753	0.901	8.07e-21		TMEM59	5.72e-17	-0.371868	0.694	0.844	1.26e-12		SVIP	2.49e-05	-0.369823	0.216	0.38	0.548934
MYL9	5.38e-25	0.519215	0.261	0.036	1.19e-20		S100A10	5.85e-17	-0.568858	0.075	0.243	1.29e-12		APEX1	2.64e-05	0.30146	0.874	0.769	0.581685
SPDEF	7.43e-25	-0.293247	0.054	0.213	1.64e-20		SNX3	6.17e-17	-0.414794	0.758	0.856	1.36e-12		POLR2L	3.35e-05	-0.319756	0.86	0.941	0.739291
ELMOD1	1.08e-24	0.40131	0.267	0.04	2.38e-20		LY6H	7.14e-17	-0.431658	0.331	0.543	1.58e-12		ANK3	4.18e-05	0.250072	0.23	0.09	0.92168
SERF2	1.18e-24	0.291206	1	1	2.6e-20		MT-CO2	8.56e-17	-0.318947	0.998	1	1.89e-12		NEUROG1	4.18e-05	0.703575	0.525	0.362	0.921949
METRN	1.75e-24	-0.401382	0.298	0.554	3.87e-20		APEX1	1.46e-16	0.399792	0.782	0.662	3.22e-12		SRP9	4.32e-05	-0.280449	0.975	0.986	0.952597
MARCKS	1.83e-24	-0.436036	0.919	0.971	4.05e-20		FHIT	2.15e-16	-0.313916	0.03	0.164	4.73e-12		IRX3	4.68e-05	0.299505	0.317	0.158	1
ELAVL3	2.96e-24	-0.433259	0.244	0.487	6.52e-20		PDLIM3	2.27e-16	-0.328062	0.13	0.311	5e-12		DNAJA1	4.98e-05	-0.30017	0.86	0.919	1
SUCNR1	4.09e-24	0.413438	0.251	0.031	9.02e-20		SDCBP	2.36e-16	-0.401405	0.517	0.71	5.21e-12		BCL7A	5.28e-05	0.345154	0.712	0.579	1
FCGRT	4.4e-24	0.410143	0.377	0.126	9.7e-20		C12orf75	2.79e-16	-0.518339	0.44	0.632	6.15e-12		SELENOW	6.04e-05	-0.257469	0.698	0.828	1
ATP5F1E	6.61e-24	0.36291	0.997	0.996	1.46e-19		HSPB1	2.8e-16	-0.427231	0.789	0.912	6.18e-12		FGFBP3	6.11e-05	0.273591	0.378	0.208	1
MSRB2	7.11e-24	0.453077	0.557	0.305	1.57e-19		IFI27L2	4.31e-16	-0.532928	0.563	0.72	9.51e-12		RND3	6.15e-05	0.372662	0.709	0.548	1
CXADR	8.15e-24	-0.364073	0.28	0.536	1.8e-19		FOXP2	6.13e-16	-0.288537	0.078	0.239	1.35e-11		HOXB2	6.22e-05	-0.295193	0.112	0.244	1
MAP2	1.33e-23	-0.442442	0.286	0.527	2.93e-19		OCIAD2	6.63e-16	-0.289658	0.166	0.366	1.46e-11		PARP1	6.9e-05	-0.287349	0.694	0.787	1
PRRX1	1.48e-23	0.363821	0.253	0.034	3.25e-19		TTR	8.41e-16	-0.37627	0.758	0.941	1.85e-11		SH3KBP1	6.99e-05	-0.317277	0.101	0.226	1
MGLL	1.51e-23	0.417714	0.235	0.025	3.32e-19		FGF1	9.33e-16	-0.282819	0.08	0.243	2.06e-11		DAAM1	7.34e-05	0.367519	0.712	0.606	1
LMO7	1.61e-23	0.40969	0.31	0.076	3.55e-19		S100A6	9.88e-16	-0.525647	0.169	0.344	2.18e-11		TSC22D1	7.49e-05	-0.311802	0.712	0.828	1
USP18	2.69e-23	0.313989	0.242	0.029	5.93e-19		IGFBP7-AS1	1.31e-15	-0.295737	0.036	0.169	2.88e-11		PSMA7	7.65e-05	-0.2512	0.989	0.991	1
UQCRQ	3.01e-23	0.402109	0.992	0.98	6.64e-19		TMSB10	1.36e-15	0.365617	1	1	3.01e-11		ARL4A	8.09e-05	0.366276	0.54	0.389	1
NES	3.52e-23	-0.421962	0.532	0.821	7.76e-19		SULF1	1.72e-15	-0.276582	0.042	0.178	3.79e-11		RGS3	8.14e-05	-0.279256	0.115	0.24	1
SORBS2	4.29e-23	-0.331324	0.108	0.296	9.46e-19		GAPDH	1.75e-15	0.30718	1	1	3.86e-11		ST18	8.71e-05	0.261304	0.446	0.29	1
JUN	5.34e-23	-0.577036	0.515	0.735	1.18e-18		RBM3	1.79e-15	0.344695	0.535	0.326	3.95e-11		AL359091.1	8.96e-05	0.38234	0.475	0.33	1
CPE	6.33e-23	0.51769	0.485	0.231	1.4e-18		DPP7	1.96e-15	-0.322306	0.102	0.268	4.33e-11		BEX4	9.11e-05	-0.28693	0.673	0.778	1
CHST2	6.49e-23	0.346174	0.282	0.056	1.43e-18		SLC15A3	1.99e-15	-0.356628	0.027	0.15	4.4e-11		NOP53	9.17e-05	0.264812	0.853	0.756	1
CKB	1.18e-22	-0.47566	0.838	0.966	2.6e-18		CENPV	2.15e-15	0.447005	0.806	0.662	4.74e-11		BEX2	0.000114765	-0.426076	0.5	0.606	1
SOX4	1.38e-22	0.448148	0.942	0.857	3.05e-18		SESN3	3.05e-15	-0.331781	0.181	0.366	6.72e-11		CXXC4	0.000115501	0.250649	0.421	0.253	1
TSPO	1.54e-22	0.464651	0.477	0.226	3.39e-18		UQCR11	3.17e-15	-0.319615	0.95	0.986	6.99e-11		SPAG9	0.000117531	0.28796	0.644	0.484	1
MAPK10	1.64e-22	-0.332486	0.255	0.5	3.61e-18		MT-CYB	3.45e-15	-0.324356	0.995	0.998	7.6e-11		CKB	0.0001341	0.416963	0.993	0.973	1
APLP2	2.26e-22	0.568686	0.672	0.469	4.98e-18		SOD1	3.74e-15	-0.300562	0.968	0.978	8.24e-11		VGLL3	0.000136748	-0.275461	0.158	0.299	1
ASRGL1	2.44e-22	-0.366225	0.291	0.52	5.39e-18		CD99	5.92e-15	-0.430056	0.858	0.911	1.31e-10		MIR99AHG	0.000151085	-0.355286	0.209	0.344	1
AKAP7	2.78e-22	0.370995	0.274	0.058	6.14e-18		IGFBP5	6.37e-15	-0.55312	0.258	0.449	1.41e-10		ELAVL2	0.000152701	0.293718	0.694	0.538	1
KIF21A	3.11e-22	-0.382054	0.242	0.471	6.85e-18		HOXB-AS1	6.42e-15	-0.259271	0.06	0.207	1.42e-10		NONO	0.000156642	0.268645	0.853	0.774	1
POLR2L	3.82e-22	0.383072	0.983	0.946	8.42e-18		DOK5	6.59e-15	-0.44801	0.354	0.54	1.45e-10		KCNQ1OT1	0.000174863	0.368184	0.871	0.724	1
PSAP	4.47e-22	-0.420755	0.63	0.787	9.85e-18		TUBB	7.82e-15	0.289878	1	0.995	1.72e-10		PHF6	0.000180248	0.279154	0.568	0.412	1
SPARC	4.64e-22	-0.423166	0.399	0.63	1.02e-17		TCEAL3	8.51e-15	-0.447429	0.38	0.565	1.88e-10		HNRNPM	0.000182633	0.285194	0.914	0.828	1
SELENOS	5.15e-22	0.548	0.676	0.478	1.14e-17		NONO	1.75e-14	0.386785	0.791	0.671	3.85e-10		SLC3A2	0.000182673	-0.289869	0.291	0.443	1
SLC8A2	6.08e-22	0.330579	0.257	0.045	1.34e-17		JUN	1.81e-14	-0.487093	0.753	0.873	3.98e-10		CDC42	0.000185008	-0.304458	0.856	0.919	1
PFN1	6.43e-22	0.37659	0.998	0.998	1.42e-17		IQGAP2	1.94e-14	-0.356748	0.142	0.315	4.29e-10		SOCS2	0.000186838	0.278829	0.299	0.163	1
FERMT2	8.33e-22	0.492486	0.485	0.253	1.84e-17		ITM2C	2e-14	-0.341616	0.355	0.559	4.42e-10		NNAT	0.000191804	-1.75312	0.32	0.403	1
SRP9	9.73e-22	-0.359213	0.958	0.989	2.15e-17		SARAF	2.09e-14	-0.385859	0.752	0.859	4.62e-10		BAALC	0.000195525	-0.298408	0.097	0.213	1
CYSTM1	1.14e-21	-0.310267	0.162	0.365	2.5e-17		ATP5MC2	2.2e-14	0.259329	1	0.998	4.86e-10		BLCAP	0.000200559	0.277981	0.504	0.339	1
DDR2	1.45e-21	0.317385	0.25	0.043	3.19e-17		SNRPF	2.54e-14	0.306724	0.934	0.873	5.6e-10		DLL3	0.000203732	0.407284	0.572	0.452	1
PRDX1	1.6e-21	-0.385809	0.929	0.975	3.54e-17		GPM6A	2.73e-14	-0.397981	0.336	0.515	6.03e-10		DPM3	0.000210263	-0.296913	0.299	0.439	1
IFIT1	2.18e-21	0.482809	0.278	0.065	4.8e-17		PBXIP1	2.87e-14	-0.301038	0.185	0.366	6.34e-10		NIN	0.000222158	0.294384	0.388	0.24	1
PTMS	2.64e-21	-0.439883	0.857	0.946	5.81e-17		NCAM1	3.36e-14	-0.388998	0.247	0.427	7.41e-10		H1F0	0.000226485	0.308955	0.827	0.62	1
REEP5	6.73e-21	0.569709	0.572	0.37	1.48e-16		POU3F2	4e-14	0.296363	0.324	0.149	8.83e-10		SCG2	0.000232313	-0.567429	0.14	0.258	1
SRM	8.28e-21	0.550333	0.718	0.534	1.83e-16		MT-ND2	5e-14	-0.326473	0.997	0.997	1.1e-09		VPS37B	0.000235042	-0.25145	0.216	0.362	1
MEST	1.15e-20	-0.405861	0.28	0.509	2.53e-16		TPM1	6.94e-14	-0.420192	0.526	0.685	1.53e-09		EPB41	0.000240486	0.389075	0.579	0.457	1
RDX	1.51e-20	-0.407729	0.699	0.863	3.34e-16		LAPTM4A	7.82e-14	-0.387718	0.533	0.706	1.73e-09		MT-ND2	0.000296536	-0.258007	0.989	0.991	1
TOMM7	1.57e-20	0.365869	0.969	0.89	3.45e-16		EIF3F	8.21e-14	0.312434	0.937	0.842	1.81e-09		HSPA8	0.00032743	-0.294587	0.946	0.968	1
SCD5	1.59e-20	-0.263194	0.177	0.388	3.52e-16		PSAP	8.37e-14	-0.365579	0.764	0.858	1.85e-09		MT-ND1	0.000329542	-0.254103	0.971	0.986	1
GRIA2	2.04e-20	0.389106	0.335	0.105	4.51e-16		HMGB1	8.82e-14	0.418989	0.989	0.994	1.95e-09		GTF2H5	0.000363482	-0.293483	0.475	0.593	1
FGFBP3	3.22e-20	-0.670053	0.428	0.639	7.1e-16		EMC10	1.01e-13	-0.339975	0.238	0.421	2.22e-09		RTN4	0.000412968	-0.253634	0.957	0.991	1
LINC01503	3.8e-20	0.347764	0.255	0.054	8.38e-16		PKM	1.02e-13	0.369274	0.971	0.97	2.25e-09		MT-ND3	0.000470341	-0.251115	0.939	0.973	1
ATP1B1	6.59e-20	-0.378527	0.241	0.451	1.45e-15		RHOC	1.46e-13	-0.359546	0.559	0.71	3.23e-09		CDK6	0.000550744	-0.399547	0.155	0.267	1
FHL1	7.29e-20	-0.372973	0.341	0.561	1.61e-15		TSPAN5	1.8e-13	-0.371318	0.286	0.463	3.97e-09		SNRPF	0.00056801	0.251257	0.888	0.81	1
PTGER3	8.05e-20	0.375799	0.303	0.087	1.77e-15		HBD	1.93e-13	-0.479895	0.306	0.466	4.26e-09		ANXA2	0.000605993	-0.349278	0.212	0.339	1
FXYD6	1e-19	-0.350962	0.502	0.747	2.22e-15		NLRP1	2e-13	-0.49521	0.315	0.484	4.42e-09		TUBA1B	0.000618503	-0.306363	0.982	0.986	1
CALD1	1.1e-19	0.535694	0.783	0.641	2.42e-15		SRSF3	2.08e-13	0.347731	0.925	0.886	4.58e-09		VIM	0.000655126	0.80404	0.896	0.864	1
EFNB3	1.15e-19	-0.28638	0.121	0.298	2.55e-15		LSM7	2.08e-13	0.304149	0.962	0.923	4.59e-09		CACYBP	0.00066481	-0.278571	0.522	0.624	1
COX5B	1.17e-19	0.362095	0.985	0.969	2.59e-15		CD58	2.4e-13	-0.299885	0.119	0.275	5.3e-09		ATP6V0E2	0.000691519	-0.259485	0.388	0.525	1
GNG11	1.51e-19	-0.29381	0.191	0.392	3.34e-15		DSTN	3.1e-13	-0.32544	0.83	0.895	6.85e-09		SLC25A5	0.00069196	0.284234	0.849	0.765	1
SP110	1.56e-19	0.322065	0.236	0.045	3.45e-15		SPARCL1	3.15e-13	-0.706266	0.098	0.244	6.95e-09		RBFOX2	0.000729797	0.301009	0.644	0.552	1
CXCL14	1.62e-19	-0.447542	0.116	0.289	3.58e-15		GPRIN3	3.27e-13	-0.272753	0.045	0.167	7.21e-09		DCX	0.000736759	0.286113	0.881	0.765	1
YWHAE	1.77e-19	-0.307527	0.988	0.991	3.89e-15		SELENOW	3.47e-13	-0.310125	0.816	0.908	7.66e-09		NEUROD4	0.000764392	0.271497	0.295	0.172	1
ENO2	1.8e-19	-0.3267	0.223	0.433	3.98e-15		SNRPN	4.65e-13	-0.352085	0.705	0.834	1.03e-08		SMOC1	0.000779876	0.279395	0.241	0.127	1
NMRAL1	2.38e-19	0.358015	0.314	0.103	5.26e-15		PAX6	8.22e-13	0.319216	0.438	0.257	1.81e-08		BASP1	0.000805286	0.31174	0.885	0.756	1
NMU	2.69e-19	0.587348	0.498	0.274	5.94e-15		KCTD13	8.59e-13	-0.417728	0.116	0.266	1.89e-08		DCXR	0.000858021	-0.259822	0.406	0.529	1
FKBP1B	4.53e-19	-0.300934	0.206	0.41	9.99e-15		ANGPT1	9.3e-13	-0.422116	0.209	0.379	2.05e-08		C1orf61	0.00091341	-0.623111	0.453	0.534	1
KCNQ2	4.72e-19	-0.328216	0.347	0.592	1.04e-14		THY1	1.13e-12	-0.522558	0.205	0.376	2.5e-08		MLLT11	0.00101678	-0.25935	1	0.995	1
ACAT2	6.56e-19	-0.538819	0.478	0.706	1.45e-14		SLC25A4	1.43e-12	-0.445344	0.542	0.664	3.15e-08		NES	0.00112425	0.405927	0.514	0.362	1
PTGR1	7.25e-19	0.401831	0.358	0.143	1.6e-14		UGP2	1.46e-12	-0.389883	0.405	0.568	3.23e-08		RND2	0.00114685	0.270641	0.331	0.204	1
CCNI	7.65e-19	-0.332348	0.919	0.98	1.69e-14		NKAIN3	1.57e-12	-0.553366	0.267	0.441	3.46e-08		EZR	0.00117991	-0.310574	0.216	0.33	1
COX4I1	1.03e-18	0.300785	0.998	0.996	2.27e-14		GPM6B	1.74e-12	-0.341589	0.831	0.901	3.83e-08		POU2F2	0.00120618	0.314953	0.374	0.24	1
TMSB15A	1.21e-18	-0.337941	0.763	0.919	2.68e-14		ASAH1	1.8e-12	-0.40453	0.37	0.529	3.97e-08		MYL6	0.00120789	-0.276244	1	1	1
ATP5PF	1.45e-18	0.356681	0.989	0.964	3.21e-14		PIFO	2.11e-12	-0.437814	0.226	0.385	4.65e-08		GNG5	0.00137999	-0.257583	0.946	0.977	1
ARHGAP18	1.6e-18	0.326698	0.324	0.11	3.53e-14		SLC25A3	2.21e-12	0.295999	0.932	0.884	4.87e-08		CDH2	0.00141948	0.253924	0.536	0.403	1
LAMA4	1.8e-18	0.473958	0.386	0.173	3.98e-14		GSTK1	2.3e-12	-0.283817	0.148	0.307	5.08e-08		SDCBP	0.00145362	-0.259279	0.482	0.584	1
PPFIA2	2.4e-18	0.356569	0.253	0.063	5.29e-14		ZFP36	2.65e-12	-0.299648	0.128	0.283	5.84e-08		TMBIM6	0.00148304	0.264003	0.788	0.688	1
STAT1	2.53e-18	0.400883	0.396	0.184	5.58e-14		IDH1	2.82e-12	0.384481	0.639	0.495	6.22e-08		YTHDF2	0.00148743	-0.272936	0.766	0.783	1
TSPAN3	2.93e-18	-0.346139	0.567	0.771	6.47e-14		MLF1	2.83e-12	-0.360542	0.423	0.582	6.25e-08		PEG10	0.00149128	0.531692	0.622	0.498	1
CRIP2	4.21e-18	-0.319252	0.348	0.576	9.28e-14		ZNF667-AS1	3.05e-12	0.253318	0.354	0.182	6.72e-08		AP2S1	0.00152652	-0.254839	0.673	0.756	1
SRPX	5.53e-18	0.281005	0.218	0.04	1.22e-13		WLS	4.31e-12	-0.340156	0.408	0.581	9.51e-08		UCHL1	0.00156324	-0.356827	0.827	0.878	1
ODC1	6.55e-18	-0.345224	0.594	0.783	1.45e-13		ATP5IF1	4.81e-12	-0.283484	0.923	0.964	1.06e-07		FHL1	0.0016597	-0.286395	0.234	0.348	1
RFX4	7.67e-18	-0.339286	0.284	0.5	1.69e-13		SFPQ	5.34e-12	0.324067	0.724	0.568	1.18e-07		ID4	0.00175882	0.356684	0.36	0.249	1
NAP1L1	7.9e-18	-0.287591	0.986	0.991	1.74e-13		SERPINB6	5.66e-12	-0.378381	0.14	0.293	1.25e-07		PDLIM4	0.0017603	-0.291023	0.14	0.244	1
APLP1	8.95e-18	-0.300495	0.286	0.498	1.98e-13		SNRPD1	5.87e-12	0.316022	0.902	0.864	1.3e-07		HSP90AA1	0.00181046	-0.25057	0.993	0.991	1
WWTR1	1.39e-17	0.348709	0.363	0.152	3.07e-13		CRABP1	7.03e-12	0.393084	0.709	0.562	1.55e-07		MINOS1	0.00182581	-0.28864	0.633	0.715	1
LGMN	1.47e-17	0.445104	0.382	0.177	3.23e-13		FILIP1	8.02e-12	0.371797	0.506	0.335	1.77e-07		C20orf27	0.00196969	-0.307955	0.284	0.398	1
QPRT	1.65e-17	0.496265	0.58	0.379	3.64e-13		ATP1B3	8.36e-12	-0.349973	0.554	0.693	1.84e-07		ANXA5	0.00208522	0.358067	0.683	0.57	1
MVD	2.03e-17	0.609591	0.534	0.339	4.48e-13		HMGB3	9.83e-12	0.364856	0.712	0.577	2.17e-07		MEG3	0.00221683	-0.776259	0.209	0.303	1
ANKRA2	2.32e-17	0.318221	0.274	0.085	5.11e-13		JUNB	9.84e-12	-0.402124	0.431	0.592	2.17e-07		UPF3B	0.00222148	-0.25005	0.342	0.457	1
SLIRP	3.6e-17	0.344057	0.963	0.935	7.93e-13		H1F0	1.01e-11	0.417402	0.637	0.454	2.24e-07		IGFBP5	0.00227734	-1.37871	0.324	0.434	1
HPCAL1	4.44e-17	0.403639	0.337	0.139	9.8e-13		MGST3	1.01e-11	-0.288338	0.818	0.892	2.24e-07		NEFM	0.00241901	0.645245	0.532	0.425	1
ANGPT1	4.59e-17	0.332006	0.346	0.139	1.01e-12		BEX2	1.03e-11	-0.323615	0.461	0.635	2.28e-07		FAM133B	0.0024747	0.266048	0.709	0.633	1
TAF7	4.72e-17	-0.357545	0.608	0.791	1.04e-12		HMGA1	1.05e-11	0.274091	0.685	0.516	2.33e-07		TFDP2	0.00285404	0.292596	0.752	0.611	1
FAP	4.88e-17	0.291179	0.189	0.027	1.08e-12		ACADVL	1.13e-11	-0.301012	0.309	0.476	2.5e-07		COTL1	0.00290826	0.310508	0.795	0.701	1
TMEM258	5.6e-17	0.264529	0.997	0.978	1.23e-12		TFDP2	1.3e-11	0.388133	0.623	0.469	2.86e-07		CLIC1	0.00293021	-0.250549	0.511	0.606	1
STAT3	8.54e-17	0.351245	0.493	0.278	1.88e-12		TPPP3	1.36e-11	-0.359878	0.151	0.305	3e-07		SRSF4	0.00299161	-0.267729	0.619	0.67	1
DDR1	1.46e-16	-0.254468	0.179	0.363	3.23e-12		TCEAL7	1.48e-11	0.252687	0.378	0.208	3.27e-07		MEST	0.00301256	-0.422519	0.378	0.475	1
NDUFA1	1.49e-16	0.366113	0.902	0.83	3.3e-12		TCF4	1.5e-11	-0.375174	0.527	0.659	3.3e-07		PTN	0.00303953	-0.323734	0.183	0.285	1
DNAJC15	1.54e-16	0.350613	0.408	0.197	3.4e-12		PEG10	1.74e-11	0.644994	0.696	0.549	3.83e-07		DSTN	0.00309522	-0.26701	0.683	0.692	1
SLC25A11	1.94e-16	0.364154	0.68	0.504	4.28e-12		ARL4A	2.15e-11	0.355297	0.63	0.462	4.73e-07		SH3BGRL	0.00329062	0.250267	0.612	0.516	1
ATP1B3	2.29e-16	-0.333355	0.488	0.67	5.05e-12		NME3	2.15e-11	-0.29201	0.358	0.524	4.75e-07		STMN2	0.00337183	0.346598	0.849	0.792	1
LGALS1	2.35e-16	0.346602	0.416	0.202	5.17e-12		SQSTM1	2.36e-11	-0.26143	0.346	0.518	5.2e-07		MIAT	0.00349437	0.261537	0.824	0.733	1
GUK1	2.37e-16	0.366468	0.875	0.796	5.22e-12		C1orf122	3.08e-11	-0.318572	0.623	0.742	6.8e-07		KLHDC8A	0.00357819	-0.388754	0.288	0.385	1
PLSCR1	2.45e-16	0.288997	0.259	0.078	5.41e-12		GDI2	3.59e-11	0.30746	0.706	0.563	7.93e-07		DECR1	0.00359692	0.256784	0.493	0.389	1
BEX4	4.4e-16	-0.321929	0.435	0.63	9.72e-12		EGR1	3.68e-11	-0.375757	0.631	0.778	8.12e-07		JUN	0.00412641	-0.326887	0.507	0.62	1
MEF2C	4.42e-16	0.336074	0.261	0.081	9.74e-12		NR2F2	3.78e-11	0.32559	0.697	0.537	8.35e-07		NRGN	0.0053508	-0.312055	0.065	0.136	1
GNAS	4.93e-16	0.354387	0.916	0.848	1.09e-11		TPM4	4.16e-11	0.291916	0.64	0.465	9.17e-07		NDUFC2	0.00606113	-0.271078	0.888	0.923	1
LYPD1	5.42e-16	-0.346319	0.11	0.258	1.2e-11		CKB	4.27e-11	0.401694	0.968	0.964	9.41e-07		FXYD6	0.00880894	-0.252597	0.579	0.647	1
CXXC5	5.66e-16	-0.286426	0.238	0.428	1.25e-11		CD63	4.69e-11	-0.279428	0.944	0.973	1.04e-06		TFAP2B	0.0102259	-0.580158	0.507	0.529	1
TPM1	5.98e-16	-0.389058	0.394	0.567	1.32e-11		AIF1L	5.86e-11	0.278711	0.438	0.274	1.29e-06		RTN1	0.010319	-0.271284	0.255	0.362	1
PRSS12	7.29e-16	0.280103	0.214	0.049	1.61e-11		NTRK2	6.64e-11	-0.394557	0.551	0.67	1.47e-06		ENC1	0.0132181	-0.279277	0.277	0.376	1
HSPE1	8.31e-16	-0.354165	0.977	0.984	1.83e-11		PTMA	7.1e-11	0.322502	0.997	1	1.57e-06		GNG3	0.0144169	-0.294628	0.507	0.597	1
CITED2	9.4e-16	-0.311967	0.217	0.392	2.07e-11		NOP53	7.21e-11	0.319438	0.759	0.673	1.59e-06		ODC1	0.016989	-0.259485	0.403	0.48	1
PGK1	9.58e-16	0.448886	0.791	0.668	2.11e-11		TIMP3	8.13e-11	-0.26678	0.066	0.182	1.79e-06		PEA15	0.019207	-0.327217	0.284	0.362	1
ISYNA1	1e-15	-0.333483	0.39	0.585	2.21e-11		LAMTOR2	8.59e-11	-0.345383	0.688	0.781	1.89e-06		MEIS2	0.0219825	-0.299256	0.554	0.597	1
HLA-B	1.1e-15	0.388687	0.254	0.078	2.42e-11		APP	9.65e-11	-0.323072	0.5	0.659	2.13e-06		CFAP298	0.028287	-0.304071	0.36	0.439	1
MLF1	1.21e-15	-0.27744	0.305	0.498	2.66e-11		LAPTM4B	9.67e-11	0.303347	0.574	0.419	2.13e-06		NPTX2	0.032899	-0.297268	0.252	0.326	1
FRMD4B	1.23e-15	0.412085	0.335	0.15	2.72e-11		CRYM	9.77e-11	-0.486212	0.191	0.338	2.16e-06		NEFL	0.0455656	0.362335	0.464	0.398	1
UQCRH	1.27e-15	0.309991	0.995	0.998	2.79e-11		GSTO1	1.53e-10	-0.264226	0.304	0.465	3.38e-06		HES6	0.0652204	0.304235	0.809	0.76	1
CRMP1	1.46e-15	-0.303638	0.388	0.592	3.23e-11		KCNIP1	1.54e-10	-0.260646	0.084	0.208	3.41e-06		TTYH1	0.0770364	0.258052	0.36	0.294	1
EEF1D	1.53e-15	0.253397	0.997	0.975	3.37e-11		ZFAS1	1.62e-10	0.286272	0.932	0.869	3.57e-06		TUBB2A	0.1045	-0.290441	0.759	0.769	1
TPBG	1.85e-15	-0.291415	0.164	0.332	4.08e-11		SPARC	1.8e-10	-0.361836	0.492	0.635	3.97e-06		TPPP3	0.117275	-0.272373	0.439	0.48	1
HES1	1.87e-15	-0.621878	0.275	0.439	4.11e-11		NENF	1.8e-10	-0.376367	0.523	0.645	3.98e-06		HMGN2	0.287108	-0.250902	0.896	0.928	1
SOD1	2.69e-15	-0.276434	0.947	0.975	5.92e-11		FTH1	2.38e-10	-0.298246	1	1	5.25e-06		GADD45G	0.57593	0.266281	0.691	0.724	1
HMGB2	2.7e-15	-0.347855	0.998	0.998	5.95e-11		NDUFC2	2.5e-10	-0.296021	0.95	0.966	5.51e-06		RGS16	0.587777	-0.258282	0.356	0.353	1
EFNB1	2.82e-15	-0.283686	0.273	0.466	6.21e-11		PLA2G16	2.75e-10	-0.266955	0.154	0.293	6.06e-06		HAUS2	0.707099	-0.453523	0.126	0.113	1
HLA-C	3.05e-15	0.371961	0.397	0.206	6.72e-11		EIF4EBP1	2.94e-10	0.363227	0.56	0.393	6.48e-06		SYT1	0.776628	-0.322387	0.633	0.597	1
NDUFA4	3.06e-15	0.273298	0.999	1	6.75e-11		RND2	3.34e-10	0.325939	0.514	0.374	7.36e-06
SAT2	3.23e-15	-0.319907	0.484	0.668	7.11e-11		REEP3	3.49e-10	-0.364449	0.303	0.448	7.7e-06
GABARAPL2	3.68e-15	-0.305993	0.693	0.834	8.12e-11		TCEAL9	3.5e-10	-0.305283	0.667	0.787	7.73e-06
GNG4	3.92e-15	-0.258609	0.16	0.325	8.64e-11		SMARCC1	3.72e-10	0.282282	0.608	0.438	8.21e-06
TCTEX1D2	4.74e-15	-0.330996	0.585	0.717	1.05e-10		GNB4	4.76e-10	-0.279596	0.158	0.294	1.05e-05
BANF1	5.06e-15	-0.267178	0.96	0.984	1.12e-10		FABP7	5.23e-10	-0.424746	0.41	0.565	1.15e-05
VAPA	5.43e-15	-0.30043	0.632	0.785	1.2e-10		PIN4	6.73e-10	0.263718	0.752	0.609	1.48e-05
ID4	6.39e-15	-0.351707	0.354	0.565	1.41e-10		SVIP	1.03e-09	-0.299419	0.33	0.485	2.27e-05
CDH11	6.49e-15	0.255557	0.259	0.085	1.43e-10		HSPA8	1.03e-09	-0.285548	0.946	0.981	2.27e-05
COX6B1	7.28e-15	0.287956	0.986	0.98	1.61e-10		BOC	1.17e-09	0.286101	0.441	0.296	2.59e-05
JAM2	8.63e-15	-0.256975	0.212	0.39	1.9e-10		MPC2	1.18e-09	-0.314848	0.622	0.726	2.6e-05
UBE2S	8.97e-15	0.464052	0.872	0.787	1.98e-10		ACAT2	1.53e-09	0.277425	0.652	0.471	3.38e-05
JOSD2	9.07e-15	0.257249	0.278	0.101	2e-10		C1orf61	1.95e-09	-0.740857	0.667	0.753	4.31e-05
IFI44L	1.06e-14	0.320844	0.2	0.045	2.35e-10		HES1	2.26e-09	-0.401255	0.429	0.571	4.99e-05
PPIB	1.19e-14	0.412794	0.853	0.783	2.63e-10		PCBD1	2.29e-09	-0.300134	0.291	0.43	5.06e-05
NRGN	1.25e-14	0.324452	0.344	0.161	2.76e-10		FOS	2.31e-09	-0.298961	0.622	0.74	5.09e-05
UBE2T	1.3e-14	-0.414141	0.731	0.816	2.87e-10		GTF3A	2.53e-09	0.297021	0.619	0.504	5.58e-05
MAPRE1	1.35e-14	-0.299625	0.511	0.673	2.98e-10		CBR1	2.95e-09	-0.262352	0.282	0.43	6.5e-05
ANP32B	1.44e-14	0.371787	0.933	0.886	3.17e-10		TKT	3.18e-09	0.276997	0.715	0.593	7e-05
PTGES3	1.59e-14	-0.27953	0.93	0.964	3.51e-10		EIF3E	3.29e-09	0.276927	0.925	0.875	7.26e-05
RHOA	1.89e-14	-0.287522	0.816	0.908	4.17e-10		CALD1	3.58e-09	-0.43452	0.678	0.75	7.9e-05
ACYP1	1.94e-14	-0.376411	0.424	0.592	4.27e-10		H2AFV	6.21e-09	0.259031	0.839	0.764	0.000137028
COL5A2	2.01e-14	0.280671	0.272	0.096	4.42e-10		CAMTA1	6.65e-09	-0.2688	0.919	0.931	0.000146672
TRMT112	2.05e-14	-0.262111	0.897	0.942	4.52e-10		NES	6.75e-09	0.318498	0.828	0.768	0.000148837
PNISR	2.28e-14	-0.303576	0.855	0.928	5.03e-10		C5orf49	6.88e-09	-0.296799	0.139	0.26	0.000151654
RNF130	2.34e-14	-0.289143	0.458	0.632	5.16e-10		SPAG16	6.89e-09	-0.334427	0.48	0.601	0.000151905
2022-09-08	2.34e-14	0.257568	0.248	0.083	5.17e-10		FXYD7	7.02e-09	0.256094	0.238	0.116	0.000154868
IFIT3	2.71e-14	0.297374	0.173	0.031	5.97e-10		ATP6V1G1	7.69e-09	-0.252846	0.961	0.966	0.000169658
GAL	2.77e-14	0.289041	0.147	0.016	6.12e-10		SRSF2	8.85e-09	0.301959	0.782	0.703	0.000195224
ARPP19	3e-14	-0.273048	0.58	0.765	6.62e-10		GLUD1	9.75e-09	-0.287874	0.369	0.504	0.000214966
HMGN1	3.13e-14	0.272163	0.99	0.973	6.89e-10		STUB1	9.77e-09	-0.255767	0.596	0.714	0.000215553
PSMA2	3.39e-14	-0.281506	0.61	0.783	7.47e-10		PTPRZ1	1.15e-08	-0.331392	0.44	0.574	0.000254656
DLK1	3.79e-14	0.279519	0.147	0.016	8.35e-10		EIF3L	1.18e-08	0.256924	0.91	0.861	0.000259473
VIM	4.95e-14	-0.313886	0.995	0.996	1.09e-09		UBE2E1	1.24e-08	-0.256557	0.375	0.513	0.000274446
PEA15	5.06e-14	-0.398504	0.387	0.547	1.12e-09		DEK	1.27e-08	0.295418	0.873	0.797	0.000279137
TUBA1A	6.89e-14	-0.308675	0.998	0.998	1.52e-09		RDX	1.29e-08	-0.280512	0.732	0.811	0.000284481
CHPT1	7.5e-14	0.349839	0.399	0.224	1.65e-09		CCND1	1.32e-08	0.29383	0.524	0.368	0.00029184
NFIC	7.86e-14	0.265732	0.295	0.119	1.73e-09		SPECC1	1.45e-08	-0.296499	0.268	0.402	0.000320642
RAB11A	7.94e-14	-0.281659	0.492	0.668	1.75e-09		RBMX	1.49e-08	0.280391	0.875	0.786	0.000329648
ZFAND5	8.01e-14	0.468094	0.612	0.464	1.77e-09		RPRM	1.57e-08	-0.372828	0.196	0.324	0.000345563
SELENOW	9.67e-14	-0.298056	0.769	0.87	2.13e-09		GABARAPL2	1.59e-08	-0.277059	0.843	0.879	0.000350387
SSB	1.04e-13	-0.29761	0.811	0.906	2.29e-09		FKBP1B	1.62e-08	-0.306274	0.411	0.556	0.000358431
SLC16A3	1.06e-13	0.299044	0.204	0.052	2.34e-09		NUPR1	1.66e-08	-0.257001	0.036	0.119	0.000365308
PTGDS	1.12e-13	0.253209	0.249	0.081	2.47e-09		LRPAP1	1.69e-08	-0.261912	0.401	0.535	0.000372579
GLUL	1.18e-13	-0.274116	0.481	0.67	2.59e-09		ENY2	2.06e-08	0.261823	0.803	0.728	0.000454113
SARAF	1.54e-13	-0.319837	0.612	0.751	3.39e-09		CYSTM1	2.17e-08	-0.260746	0.369	0.499	0.000479128
TIMP1	1.98e-13	0.684098	0.432	0.258	4.36e-09		SELENOM	2.28e-08	-0.251363	0.283	0.421	0.000503191
TMEM14A	2.08e-13	-0.258723	0.221	0.386	4.59e-09		MARCKS	2.38e-08	0.255086	0.967	0.951	0.000523938
ARL6IP6	2.16e-13	-0.290988	0.467	0.628	4.77e-09		CCL2	2.4e-08	-0.383678	0.125	0.241	0.000530076
CDKN1A	2.39e-13	0.335803	0.294	0.126	5.27e-09		MT-ND3	2.51e-08	-0.273974	0.982	0.989	0.000553417
NPC2	2.58e-13	-0.344522	0.66	0.794	5.69e-09		TUBA1B	2.72e-08	0.324559	0.988	0.989	0.000600682
MALAT1	2.82e-13	-0.40123	1	1	6.22e-09		H2AFZ	3.64e-08	0.278135	0.994	0.995	0.000803726
PTPRZ1	2.95e-13	-0.297866	0.198	0.359	6.51e-09		XRCC6	4.34e-08	0.25653	0.825	0.745	0.000957858
EIF1B	4.28e-13	-0.310044	0.577	0.722	9.45e-09		TUBB2A	4.42e-08	-0.354543	0.77	0.851	0.000974592
PAK1	4.58e-13	0.375967	0.542	0.379	1.01e-08		NAXE	4.65e-08	-0.272741	0.527	0.638	0.00102654
C4orf48	4.97e-13	-0.281333	0.899	0.946	1.1e-08		C19orf48	5.06e-08	0.267461	0.477	0.34	0.0011164
TPR	6.08e-13	0.368175	0.9	0.848	1.34e-08		CHN1	5.35e-08	-0.381849	0.312	0.435	0.00118104
NDUFC2	6.27e-13	-0.27126	0.921	0.971	1.38e-08		SCP2	5.43e-08	-0.307726	0.569	0.657	0.00119859
C5orf24	6.91e-13	0.319427	0.537	0.374	1.52e-08		SQLE	6.76e-08	0.267402	0.654	0.527	0.00149109
ANKRD12	1e-12	-0.261828	0.35	0.522	2.21e-08		LEPROT	6.93e-08	-0.25133	0.44	0.574	0.00152868
DDAH2	1.09e-12	-0.269458	0.66	0.818	2.41e-08		CFAP126	7.51e-08	-0.366352	0.12	0.228	0.00165686
TCEAL5	1.26e-12	0.296217	0.233	0.083	2.78e-08		FRZB	8.83e-08	-0.651806	0.122	0.227	0.00194813
ZSCAN16-AS1	1.3e-12	0.288865	0.465	0.289	2.86e-08		TMEM205	9.6e-08	-0.2958	0.352	0.473	0.00211807
COX7B	1.34e-12	0.333677	0.959	0.926	2.95e-08		AL359091.1	9.8e-08	0.269131	0.28	0.163	0.00216179
SNHG8	1.37e-12	0.340436	0.428	0.258	3.02e-08		PHPT1	1.05e-07	-0.25489	0.95	0.978	0.00231392
TAGLN3	1.39e-12	-0.380901	0.222	0.383	3.07e-08		HMGN2	1.34e-07	0.305091	0.974	0.973	0.00296154
RTN4	1.42e-12	-0.315784	0.863	0.933	3.14e-08		FADS1	1.41e-07	0.263552	0.598	0.479	0.00310351
AC004158.1	1.44e-12	0.284634	0.193	0.054	3.17e-08		GNG3	1.44e-07	-0.34301	0.348	0.482	0.00317848
TSC22D1	1.5e-12	-0.356859	0.553	0.691	3.31e-08		FDFT1	1.6e-07	0.279579	0.747	0.632	0.00353758
HMGA1	1.59e-12	-0.417527	0.757	0.83	3.5e-08		CYR61	1.98e-07	-0.395568	0.506	0.603	0.00436032
MSI1	2.3e-12	-0.312617	0.272	0.444	5.07e-08		UBXN11	2.05e-07	-0.260066	0.271	0.388	0.00451832
ATP5ME	2.53e-12	0.254603	0.986	0.975	5.58e-08		BIRC5	2.8e-07	0.266561	0.3	0.182	0.0061775
RCN2	3.1e-12	-0.272954	0.738	0.865	6.84e-08		SH3KBP1	2.85e-07	-0.291219	0.255	0.371	0.00629409
ADI1	3.44e-12	0.357867	0.634	0.478	7.58e-08		KIF9	3.02e-07	-0.305346	0.395	0.504	0.00666965
S100B	3.63e-12	-0.29001	0.135	0.271	8e-08		GADD45G	3.58e-07	-0.325207	0.164	0.277	0.00790229
IFT57	3.68e-12	-0.280951	0.364	0.522	8.12e-08		COX20	5.78e-07	-0.264679	0.578	0.673	0.0127464
MYC	3.8e-12	0.265844	0.208	0.065	8.38e-08		EFNB3	5.91e-07	-0.25761	0.187	0.302	0.0130403
EIF2AK2	4.35e-12	0.333455	0.534	0.365	9.6e-08		SRI	5.97e-07	-0.252045	0.831	0.876	0.0131689
VGLL3	4.73e-12	-0.410921	0.421	0.547	1.04e-07		AP1S2	1.15e-06	-0.504294	0.529	0.609	0.0253294
PHLDA1	5.42e-12	-0.280347	0.112	0.238	1.2e-07		MIF	2.39e-06	0.357684	0.895	0.887	0.0527031
C9orf16	5.59e-12	0.276692	0.842	0.76	1.23e-07		LMO4	2.73e-06	-0.417353	0.544	0.634	0.0602235
DUSP23	5.99e-12	0.334808	0.306	0.148	1.32e-07		CITED2	2.74e-06	-0.27776	0.351	0.454	0.0604773
CHD3	6.1e-12	0.284192	0.381	0.217	1.35e-07		IGFBP2	2.84e-06	0.297347	0.596	0.484	0.0627183
SPOCK1	6.34e-12	0.259903	0.279	0.123	1.4e-07		CRB2	3.02e-06	0.250298	0.464	0.349	0.0665379
PSME2	6.79e-12	0.334543	0.678	0.536	1.5e-07		NASP	4.16e-06	0.257055	0.735	0.632	0.0917604
BTG3	7.27e-12	-0.337136	0.578	0.697	1.6e-07		HILPDA	1.88e-05	0.377712	0.349	0.247	0.414635
PAPOLA	7.91e-12	-0.275437	0.69	0.803	1.75e-07		PTN	2.81e-05	-0.333799	0.577	0.687	0.619974
SOX9	8.14e-12	-0.31175	0.276	0.426	1.8e-07		MIR4435-2HG	3.32e-05	0.353512	0.218	0.136	0.731366
DENR	8.45e-12	0.297622	0.63	0.48	1.86e-07		SNCG	3.58e-05	-0.280879	0.125	0.208	0.790291
BHLHE22	9.93e-12	0.263867	0.229	0.085	2.19e-07		BAX	3.62e-05	-0.282222	0.673	0.743	0.798932
GSTO1	1e-11	0.355664	0.551	0.408	2.21e-07		PHGDH	4.46e-05	0.27466	0.616	0.515	0.982921
APOE	1.02e-11	0.39934	0.291	0.137	2.25e-07		MAD2L2	4.49e-05	-0.260392	0.578	0.631	0.989533
NFIA	1.1e-11	-0.458792	0.229	0.368	2.42e-07		NNAT	6.33e-05	-0.464808	0.355	0.424	1
SELENOK	1.11e-11	-0.272569	0.785	0.874	2.45e-07		B2M	7.16e-05	-0.344253	0.741	0.793	1
CEBPD	1.15e-11	0.359679	0.25	0.101	2.54e-07		GTF2A2	8.92e-05	-0.27605	0.776	0.803	1
SERPINB6	1.23e-11	0.310702	0.325	0.166	2.71e-07		ZBTB20	0.000125715	-0.295992	0.458	0.518	1
PAIP2	1.61e-11	-0.252944	0.77	0.859	3.55e-07		SAT1	0.000143237	-0.290911	0.279	0.365	1
GSTM3	1.67e-11	0.300967	0.551	0.39	3.68e-07		RFX4	0.000423696	-0.251049	0.553	0.599	1
SNHG7	1.68e-11	-0.309795	0.445	0.592	3.71e-07		GSDME	0.000461396	-0.275774	0.074	0.13	1
THRAP3	1.73e-11	0.259913	0.87	0.789	3.81e-07		MEG3	0.000774948	-0.308369	0.205	0.279	1
RHBDD2	1.81e-11	-0.26055	0.418	0.576	3.99e-07		HIST1H2AC	0.000945557	-0.338265	0.38	0.432	1
DDT	2.45e-11	0.312951	0.755	0.635	5.4e-07		IFI27	0.000960234	0.262976	0.123	0.069	1
RSRC2	2.56e-11	-0.283911	0.773	0.857	5.64e-07		CRYAB	0.00107586	-0.772524	0.107	0.164	1
GAMT	2.83e-11	0.271498	0.537	0.372	6.25e-07		CYTOR	0.00159328	0.25438	0.217	0.152	1
SIVA1	3e-11	0.259801	0.88	0.798	6.62e-07		APOE	0.00946766	-1.29477	0.122	0.167	1
DCP2	3.96e-11	0.260617	0.454	0.291	8.73e-07		HES4	0.00951302	-0.274016	0.828	0.831	1
WRB	4.23e-11	-0.271487	0.365	0.511	9.32e-07		ID3	0.0952553	-0.482873	0.652	0.646	1
WLS	4.43e-11	-0.287261	0.352	0.502	9.77e-07		CYP26A1	0.782184	-0.27776	0.179	0.167	1
FADS1	4.52e-11	-0.290538	0.546	0.702	9.98e-07
PPP1R14C	4.83e-11	0.252468	0.312	0.155	1.07e-06
AKAP12	5.23e-11	0.398103	0.614	0.444	1.15e-06
DPY30	6.55e-11	-0.268197	0.656	0.78	1.44e-06
CNBP	6.55e-11	-0.254862	0.864	0.922	1.44e-06
MAP4K4	7.52e-11	0.296164	0.496	0.334	1.66e-06
DHX36	1.05e-10	0.313408	0.617	0.493	2.32e-06
SSR2	1.5e-10	0.259106	0.913	0.848	3.3e-06
DEPDC1	1.77e-10	0.321517	0.456	0.303	3.9e-06
CCNG1	1.97e-10	-0.262134	0.504	0.648	4.35e-06
AC084033.3	2.29e-10	-0.292264	0.406	0.561	5.04e-06
LAPTM4A	2.58e-10	0.368538	0.669	0.556	5.68e-06
EML4	2.63e-10	0.252746	0.344	0.193	5.81e-06
ARL3	3.17e-10	-0.261621	0.727	0.807	6.99e-06
PSAT1	3.48e-10	-0.297746	0.435	0.581	7.67e-06
PCMT1	3.99e-10	-0.264764	0.536	0.664	8.81e-06
TTC3	4.01e-10	-0.310944	0.77	0.845	8.83e-06
P4HB	4.33e-10	0.261968	0.776	0.664	9.55e-06
GNL3	4.53e-10	0.252774	0.529	0.37	9.98e-06
COA1	6.05e-10	-0.283069	0.56	0.675	1.33e-05
CAV1	7.33e-10	0.268809	0.147	0.038	1.62e-05
HACD3	7.63e-10	-0.274352	0.665	0.769	1.68e-05
TPGS2	7.64e-10	-0.259728	0.641	0.744	1.68e-05
TSEN34	8.52e-10	0.319542	0.688	0.59	1.88e-05
YBX3	1e-09	0.286758	0.455	0.307	2.21e-05
ATOX1	1.01e-09	0.263444	0.81	0.74	2.24e-05
HSPA8	1.19e-09	-0.299109	0.977	0.993	2.63e-05
MZT2A	1.23e-09	0.284396	0.735	0.617	2.72e-05
ARL6IP5	1.26e-09	-0.274212	0.407	0.534	2.79e-05
IDH1	1.3e-09	0.29759	0.683	0.565	2.87e-05
H3F3B	1.66e-09	-0.259817	0.999	1	3.66e-05
IER3	1.73e-09	0.25021	0.255	0.121	3.82e-05
FEZ1	1.81e-09	-0.288999	0.602	0.717	3.99e-05
NFKBIA	2.5e-09	0.330897	0.388	0.249	5.5e-05
RHEB	3.05e-09	-0.27659	0.768	0.841	6.73e-05
TK1	3.74e-09	0.2587	0.672	0.527	8.26e-05
H1FX	3.78e-09	-0.27632	0.733	0.825	8.34e-05
SMS	4.73e-09	-0.251705	0.675	0.783	0.000104432
GYPC	7.95e-09	-0.322331	0.451	0.565	0.000175276
HES6	8.61e-09	-0.55241	0.415	0.547	0.000190004
LIMCH1	9.12e-09	0.283184	0.752	0.63	0.000201082
SLC25A5	9.41e-09	0.274055	0.937	0.93	0.00020764
LDHA	9.64e-09	0.407289	0.714	0.635	0.000212649
CLIC1	1.14e-08	-0.265131	0.733	0.805	0.000251375
GNG3	1.16e-08	-0.268809	0.187	0.305	0.000256088
CKS2	1.35e-08	-0.373976	0.949	0.978	0.000297163
CCND1	1.63e-08	0.308533	0.667	0.529	0.000360207
HSPD1	2.33e-08	-0.251781	0.974	0.973	0.000513327
HNRNPF	3.15e-08	-0.255461	0.633	0.722	0.000695649
APRT	6.34e-08	0.275556	0.721	0.639	0.00139929
P4HA1	1.19e-07	0.269332	0.324	0.195	0.002621
GPM6A	1.59e-07	-0.265871	0.158	0.258	0.00350567
S100A10	3.97e-07	-0.279628	0.046	0.11	0.00874773
ZFAND6	4.11e-07	0.255651	0.653	0.561	0.00906622
PTN	4.52e-07	-0.767887	0.543	0.601	0.00996463
FDPS	5.75e-07	0.354407	0.882	0.827	0.0126846
ECH1	6.44e-07	0.283483	0.64	0.561	0.0142156
NKAIN3	8.92e-07	-0.272059	0.229	0.332	0.0196856
CLSPN	9.84e-07	0.287555	0.756	0.67	0.0217015
MMAB	1.02e-06	0.258605	0.513	0.404	0.022444
GAP43	1.03e-06	-0.292617	0.255	0.365	0.022687
CYR61	1.37e-06	-0.307508	0.45	0.54	0.030202
PCDH9	1.44e-06	0.317281	0.408	0.305	0.0318014
SLC3A2	1.54e-06	-0.286749	0.472	0.556	0.0339944
CHCHD2	1.71e-06	-0.349612	0.547	0.639	0.0377654
FABP7	3.52e-06	-0.399426	0.164	0.253	0.0776388
TMBIM4	4.66e-06	0.389782	0.536	0.435	0.102755
DDIT4	2.8e-05	-0.538392	0.356	0.442	0.6173
JUNB	3.94e-05	0.419722	0.507	0.43	0.868321
RND3	9.26e-05	0.258436	0.498	0.415	1
TNFRSF12A	0.000280053	-0.292132	0.158	0.229	1
ERG28	0.00216419	0.299512	0.595	0.558	1
H1F0	0.00493782	-0.283993	0.57	0.61	1
FAM162A	0.0059405	0.383999	0.502	0.455	1
TMEM97	0.016616	0.258227	0.715	0.711	1
CRABP1	0.0373471	-0.568973	0.869	0.76	1
UBE2C	0.143413	-0.255191	0.935	0.93	1
C1orf61	0.74858	-0.386522	0.495	0.426	1
ID3	0.945729	-0.257595	0.779	0.697	1
